# Supplementary material for: Chain length effect of spiro-ringN-alkylation on photophysical signalling parameters in Fe(iii) selective rhodamine probes
Source: Royal Society of Chemistry journal article supplement (doi:10.1039/d2ob00194b), 2022-01-01
Supplement: d2ob00194b1.pdf [file d2ob00194b1.pdf]

## Chain length effect of spiro-ring N-alkylation on photophysical signalling parameters in Fe(III) selective Rhodamine probes

Suryakanta Dehuri,<sup>a,b</sup> Santosh Kumar Mishra<sup>a</sup> and Bamaprasad Bag<sup>\*,a,b</sup>

<sup>a</sup> Materials Chemistry Department, CSIR-Institute of Minerals and Materials Technology, Bhubaneswar 751 013, Odisha, India. Email: *bpbag@immt.res.in*

<sup>b</sup> Academy of Scientific and Innovative Research (AcSIR), Ghaziabad- 201002, India.

### Electronic Supplementary Information

| Contents                                                                                                                             | Page No.   |
|--------------------------------------------------------------------------------------------------------------------------------------|------------|
| Characterization of the probes (ESI-MS, <sup>1</sup> H and <sup>13</sup> C NMR)                                                      | SP2-SP16   |
| Absorption spectra of the probes in various solvents                                                                                 | SP17       |
| Absorption and fluorescence spectra of the probes in presence of various ionic inputs, Their complexation stoichiometry with Fe(III) | SP18-SP21  |
| Excited state life-time decay profile                                                                                                | SP21-SP22  |
| Job's plot                                                                                                                           | SP23       |
| Characterization of few complexes of the probes (ESI-MS and FT-IR)                                                                   | SP23-SP27  |
| Absorption and fluorescence spectral data (Titration, determination of association constants, LOD, kinetics of spiro-ring opening)   | SP28-SP37  |
| High resolution (narrow scan) XPS plots of few complexes                                                                             | SP34-SP37  |
| Absorption and fluorescence spectra of the probes in presence of various ionic inputs in various solvents                            | SP38-SP40  |
| Photophysical spectral responses in varying pH, reversibility, kinetics                                                              | SP41-SP42  |
| Particle size analysis (DLS) data of few probes and their Fe(III) complexes                                                          | SP43- SP44 |
| Schematic representation of mechanism of Fe(III) coordination                                                                        | SP45       |

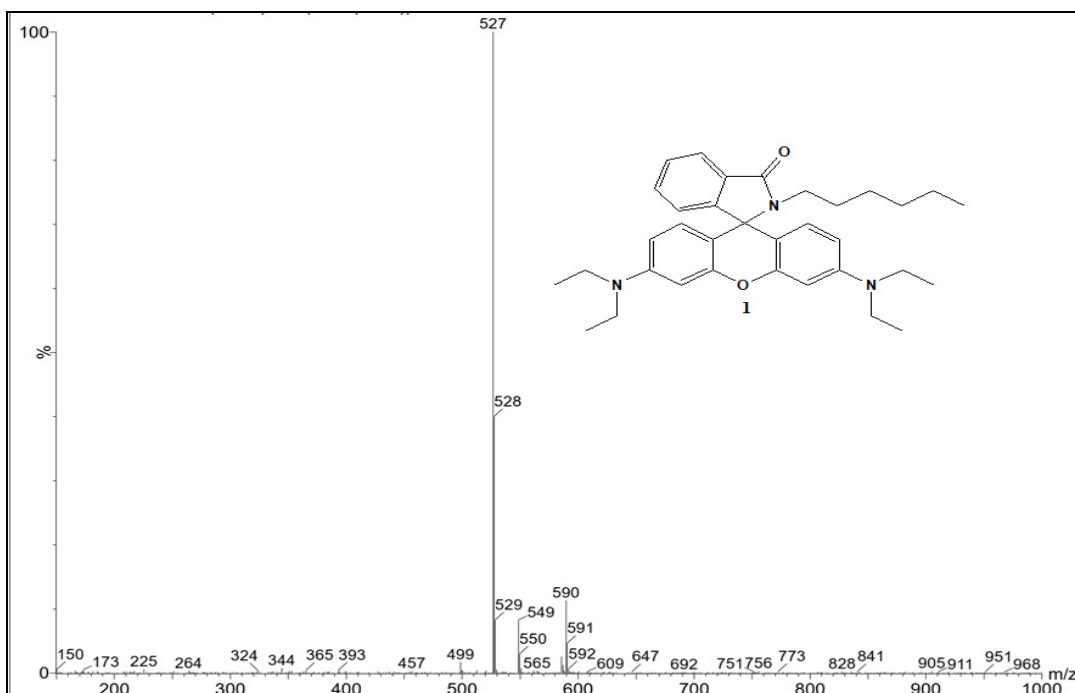

**Fig. S1:** MS (ESI) spectrum of compound **1**.

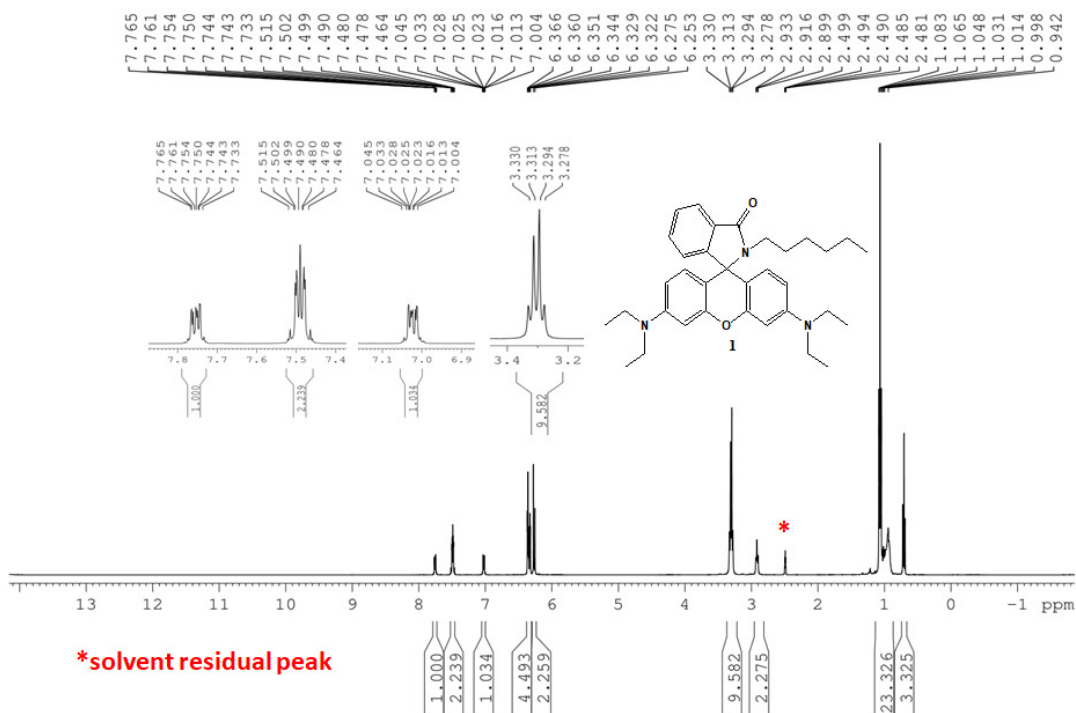

**Fig. S2:** <sup>1</sup>H NMR spectrum of compound **1** (in DMSO-d<sub>6</sub>, 400MHz)

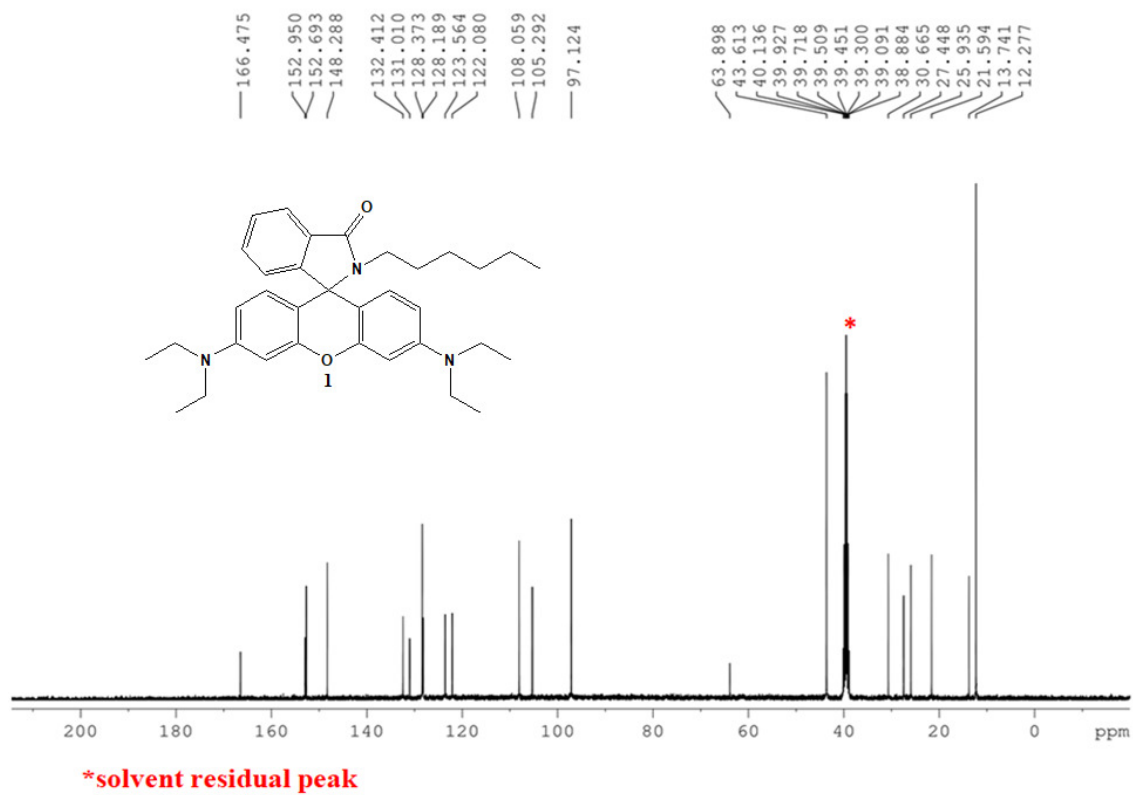

Fig. S3:  $^{13}\text{C}$  NMR spectrum of compound 1 (in  $\text{DMSO-d}_6$ ).

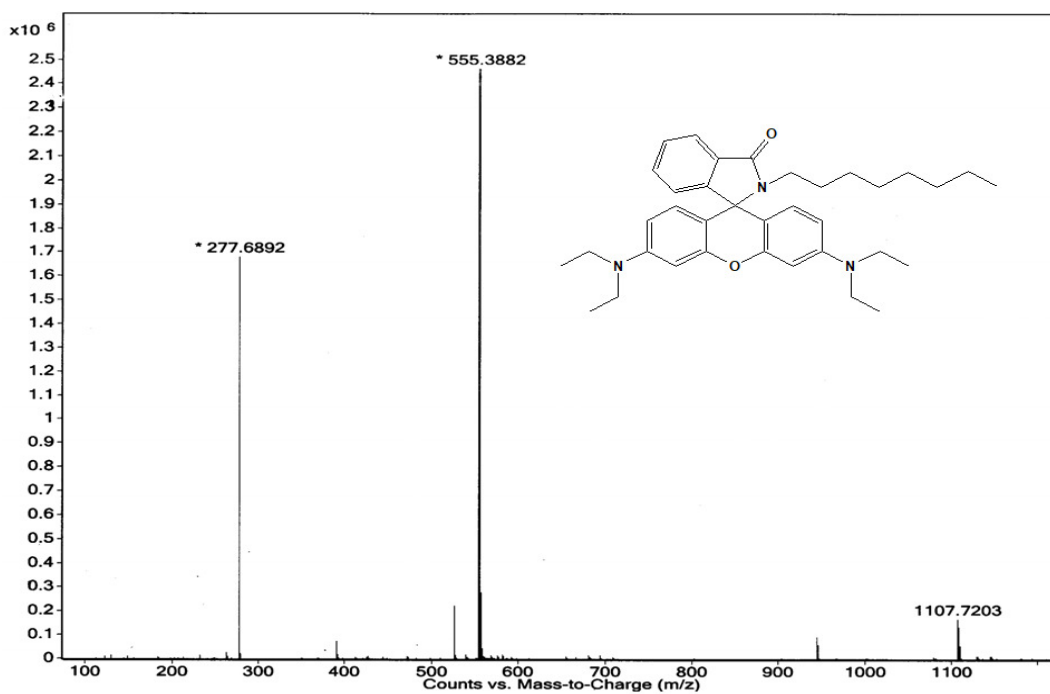

Fig. S4: MS (ESI) spectrum of compound 2.

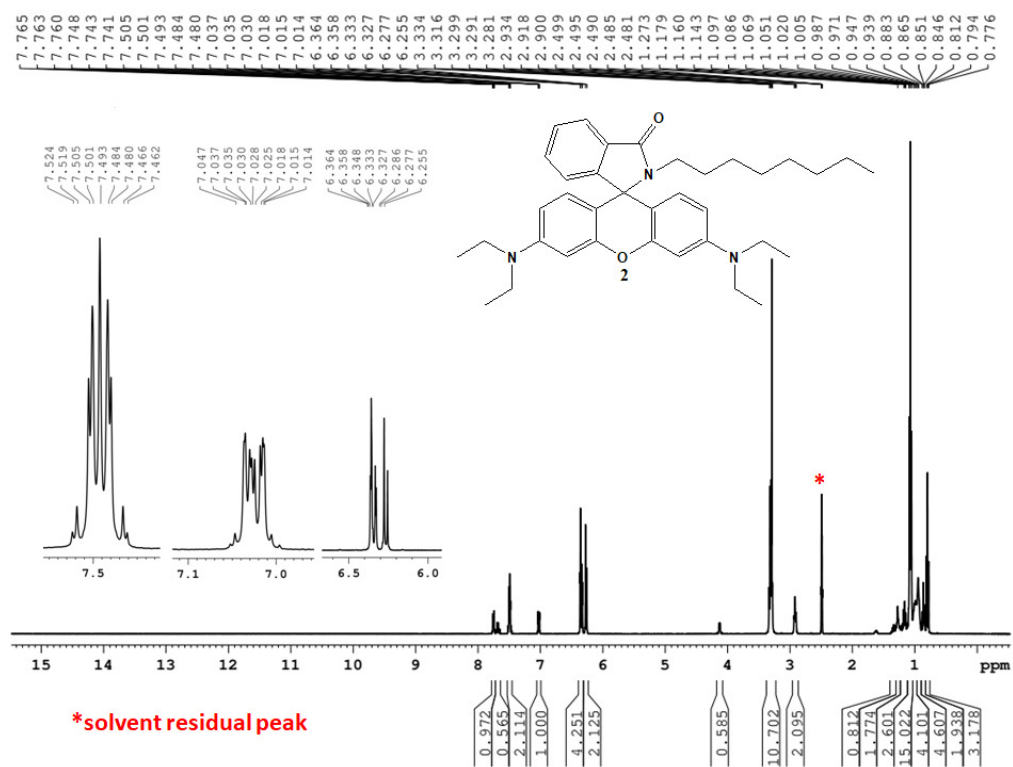

Fig. S5: <sup>1</sup>H NMR spectrum of compound 2 (in DMSO-d<sub>6</sub>)

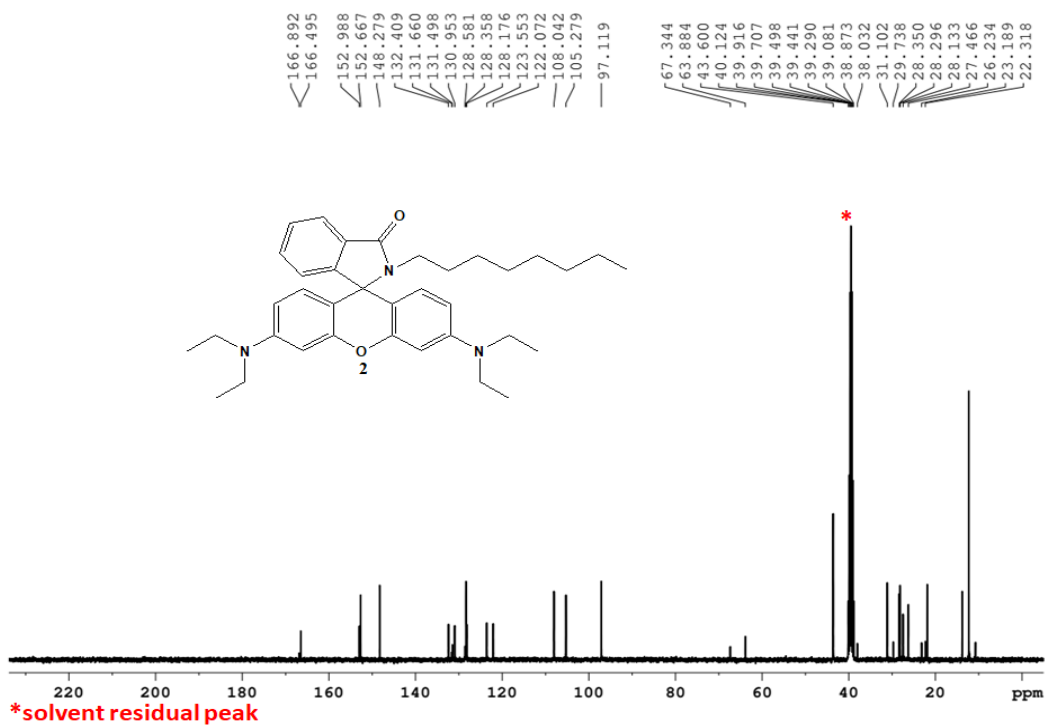

Fig. S6: <sup>13</sup>C NMR spectrum of compound 2 (in DMSO-d<sub>6</sub>).

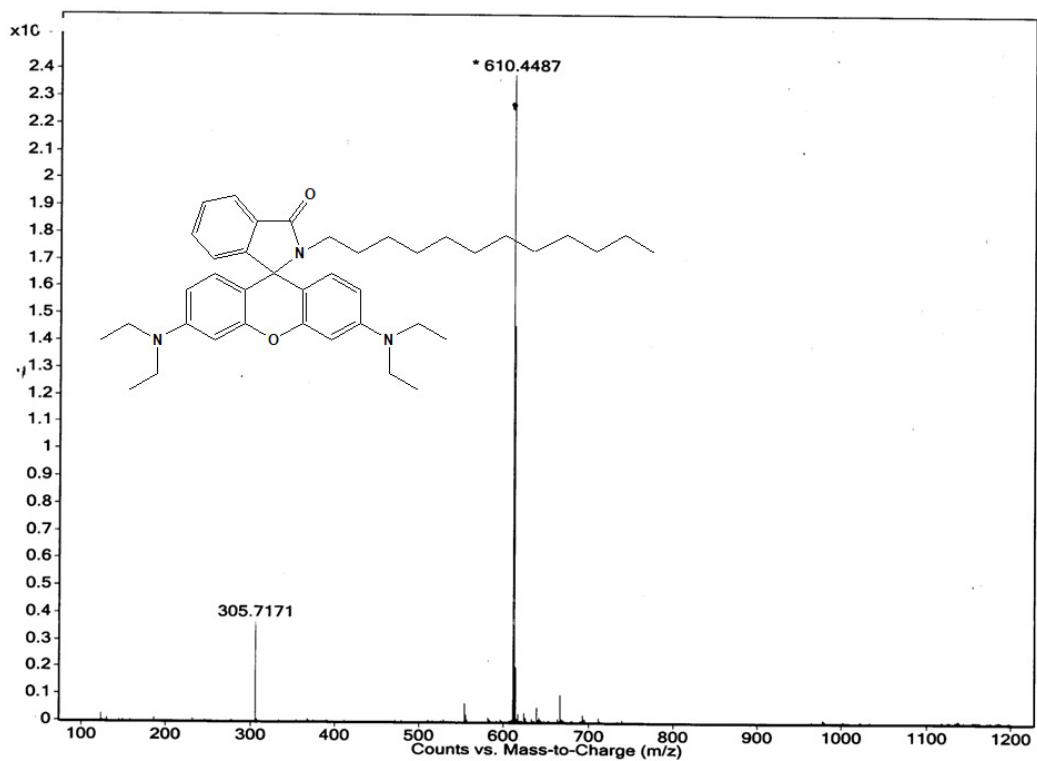

Fig. S7: MS (ESI) spectrum of compound 3.

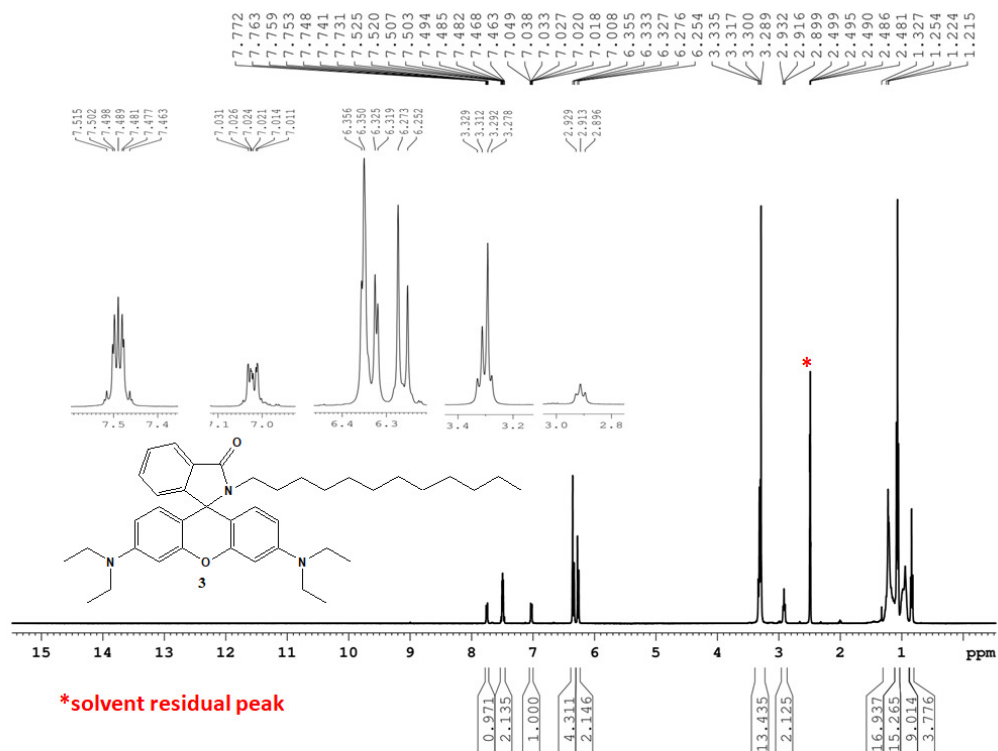

Fig. S8:  $^1\text{H}$  NMR spectrum of compound 3 (in  $\text{DMSO-d}_6$ )

SP5

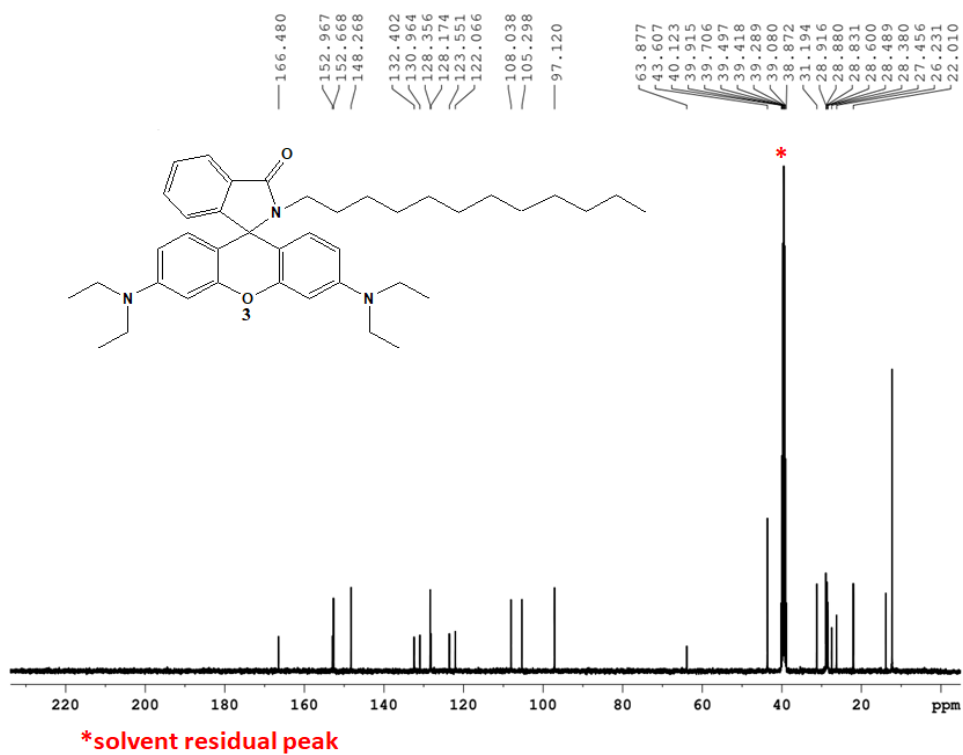

Fig. S9:  $^{13}\text{C}$  NMR spectrum of compound 3 (in  $\text{DMSO-d}_6$ ).

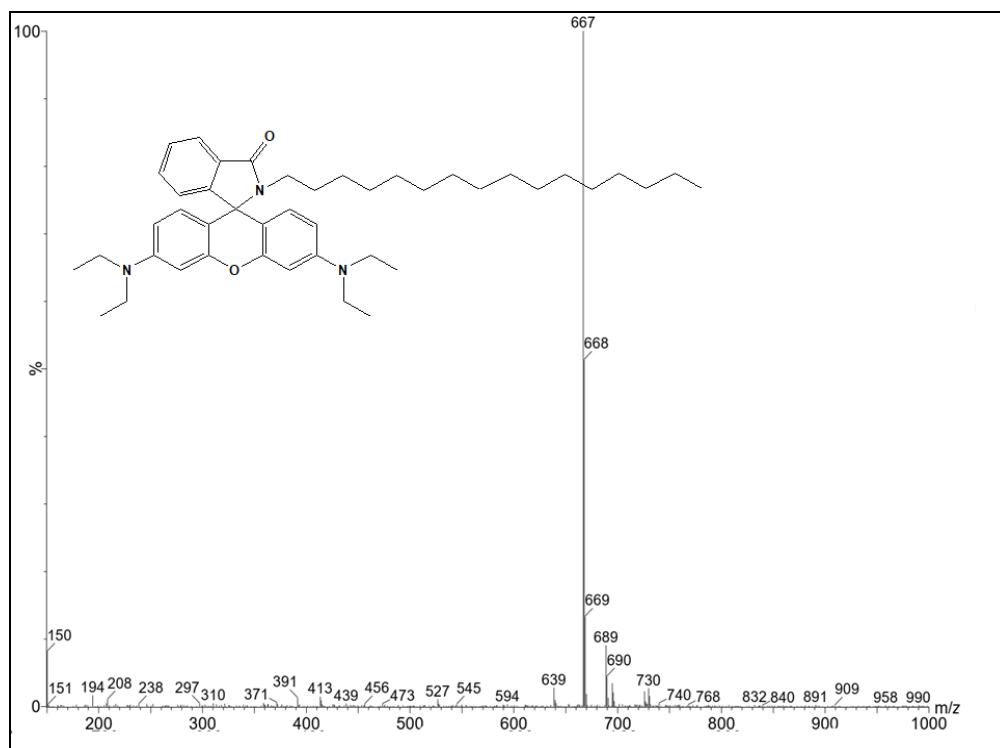

Fig. S10: MS (ESI) spectrum of compound 4.

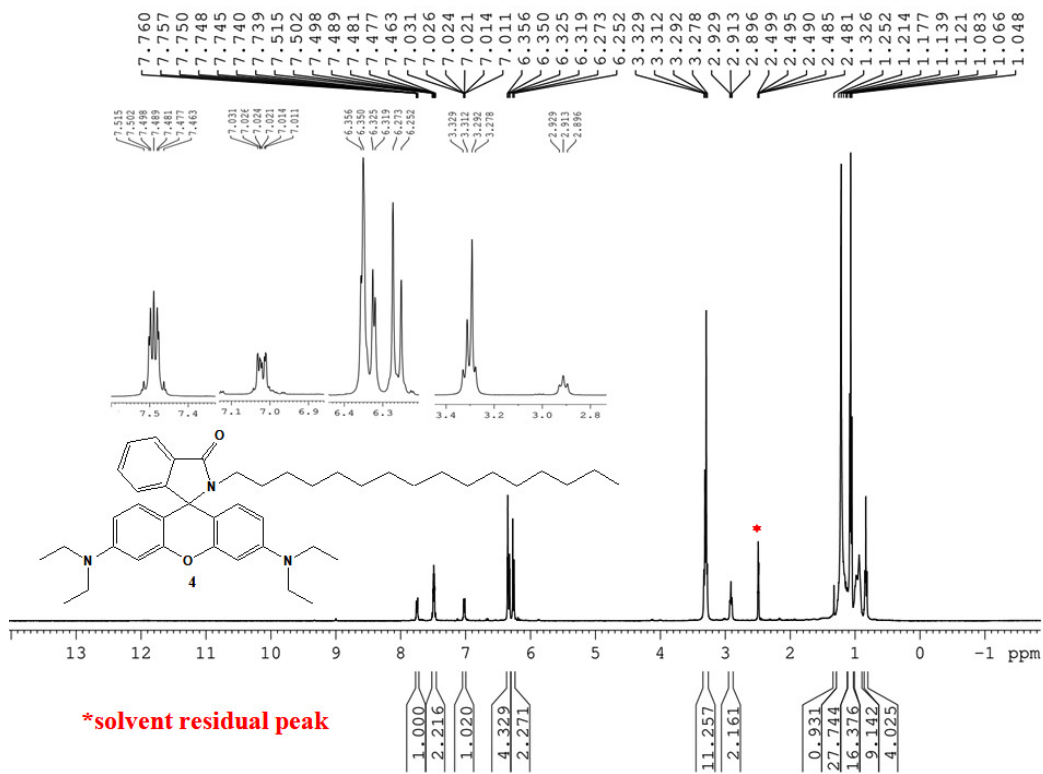

Fig. S11: <sup>1</sup>H NMR spectrum of compound 4 (in DMSO-d<sub>6</sub>)

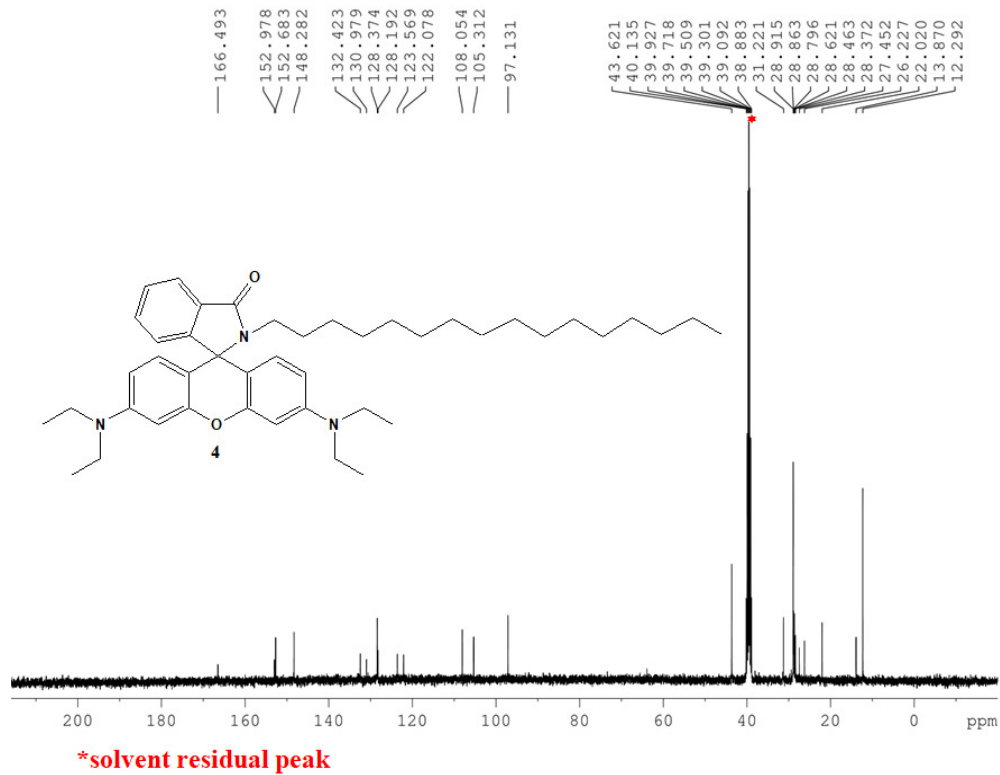

Fig. S12: <sup>13</sup>C NMR spectrum of compound 4 (in DMSO-d<sub>6</sub>).

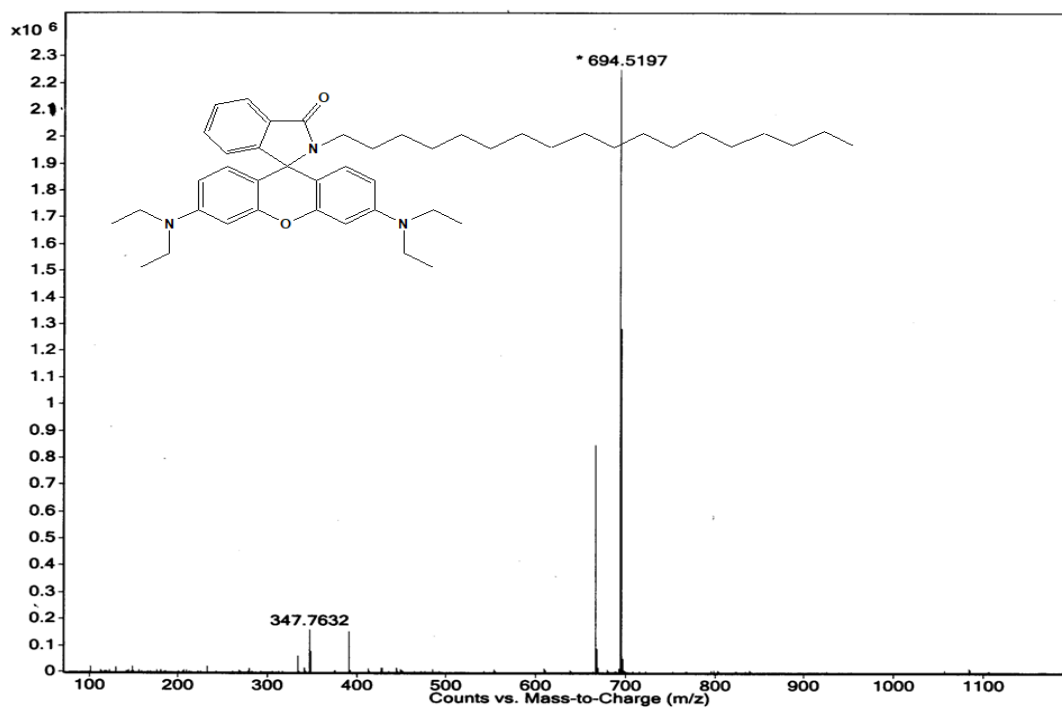

Fig. S13: MS (ESI) spectrum of compound 5.

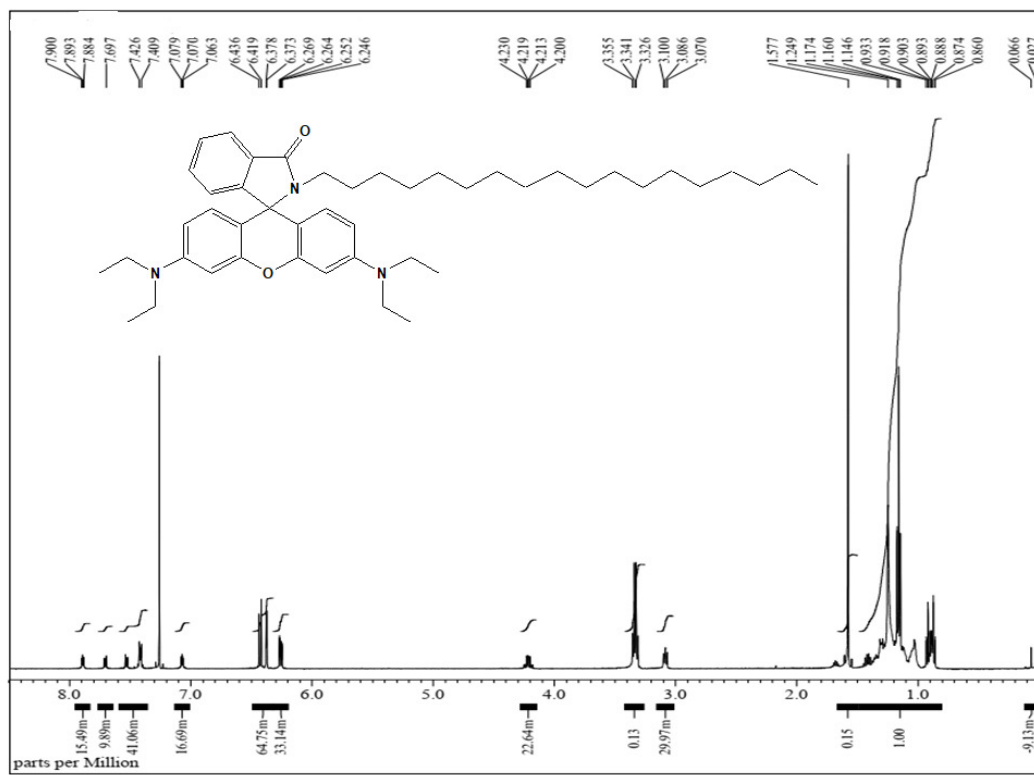

Fig. S14: <sup>1</sup>H NMR spectrum of compound 5 (in CDCl<sub>3</sub>)



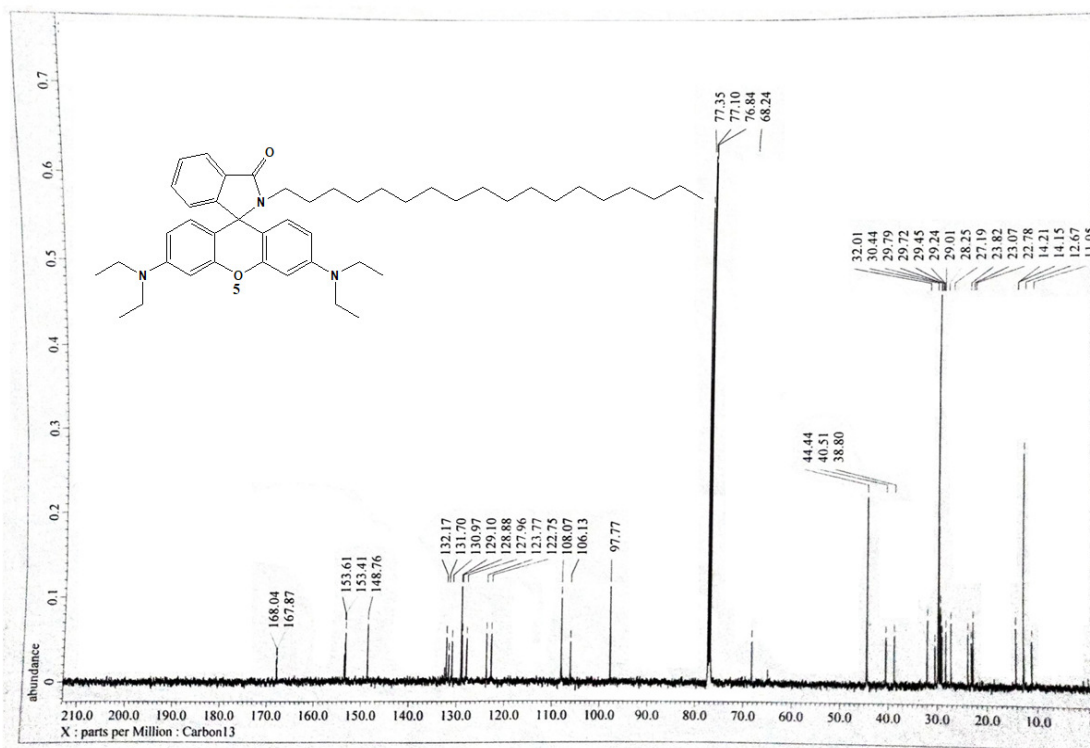

Fig. S15:  $^{13}\text{C}$  NMR spectrum of compound 5 (in  $\text{CDCl}_3$ )

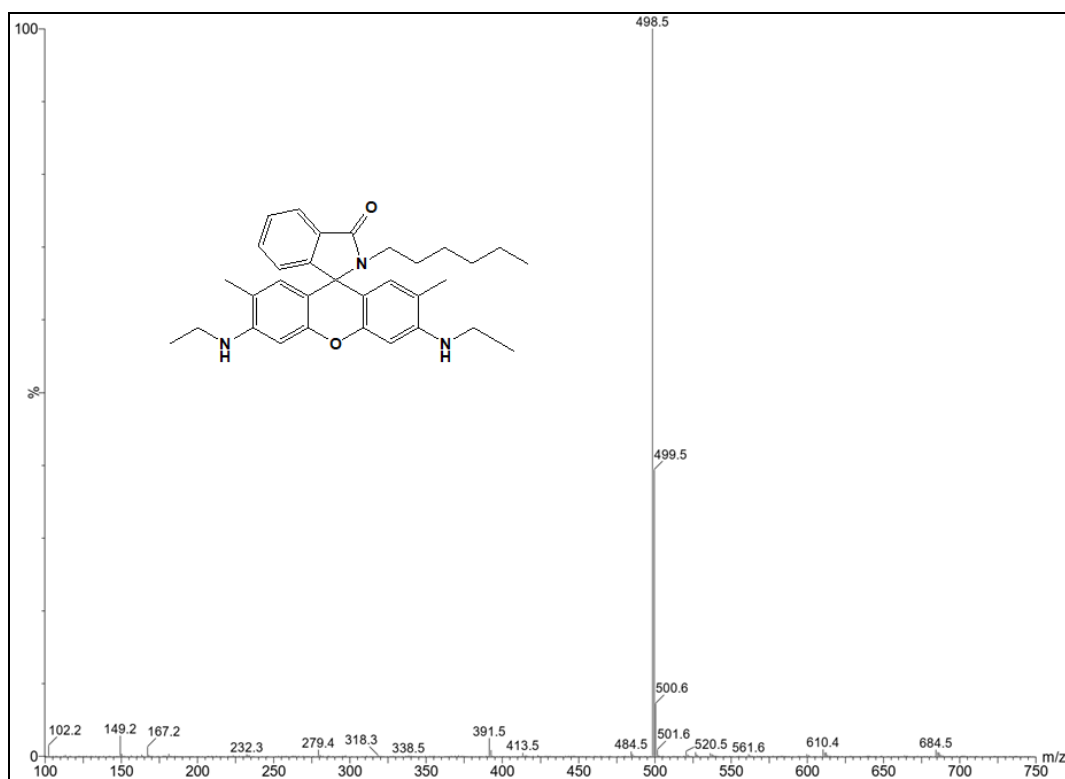

Fig. S16: MS (ESI) spectrum of compound 6.

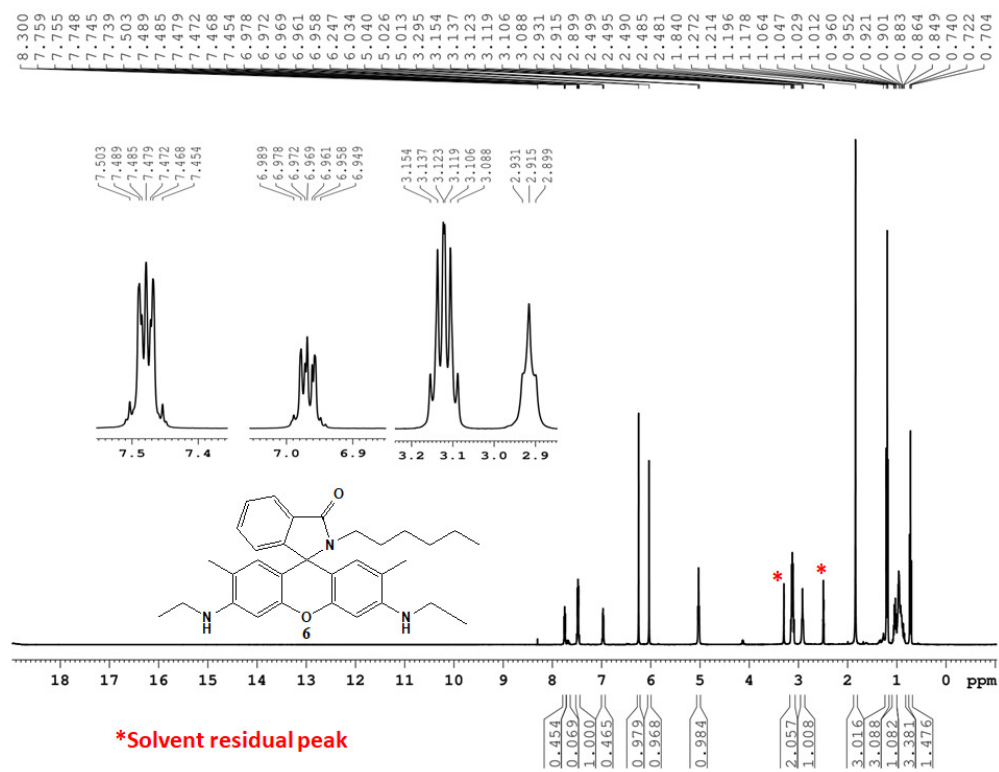

**Fig. S17:** <sup>1</sup>H NMR spectrum of compound 6 (in DMSO-d<sub>6</sub>)

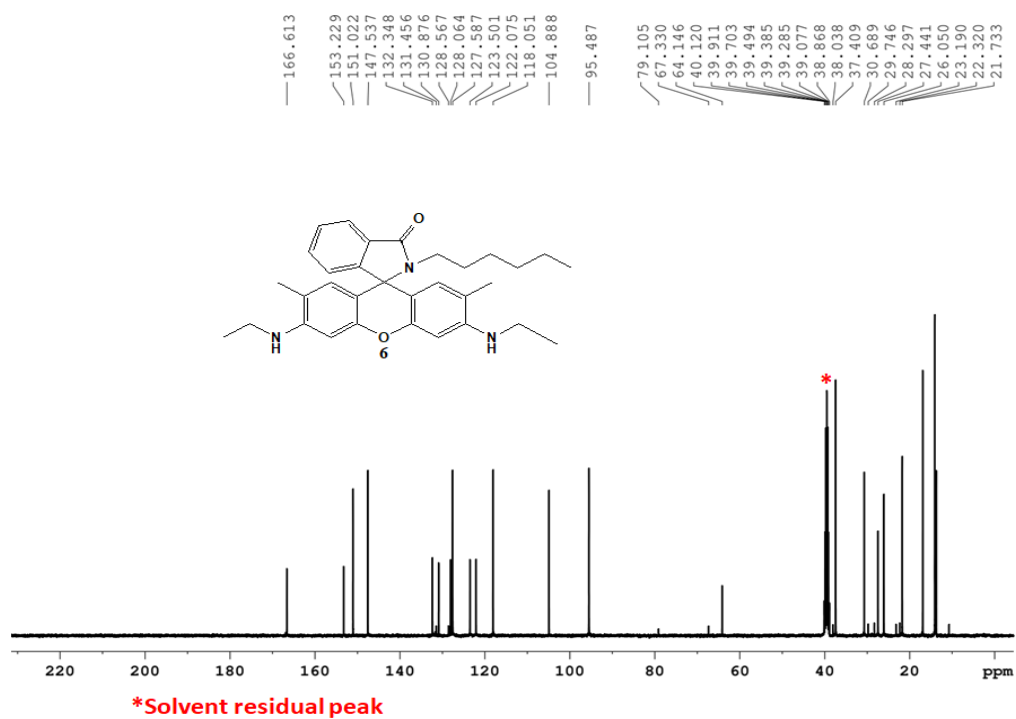

**Fig. S18:** <sup>13</sup>C NMR spectrum of compound 6 (in DMSO-d<sub>6</sub>).

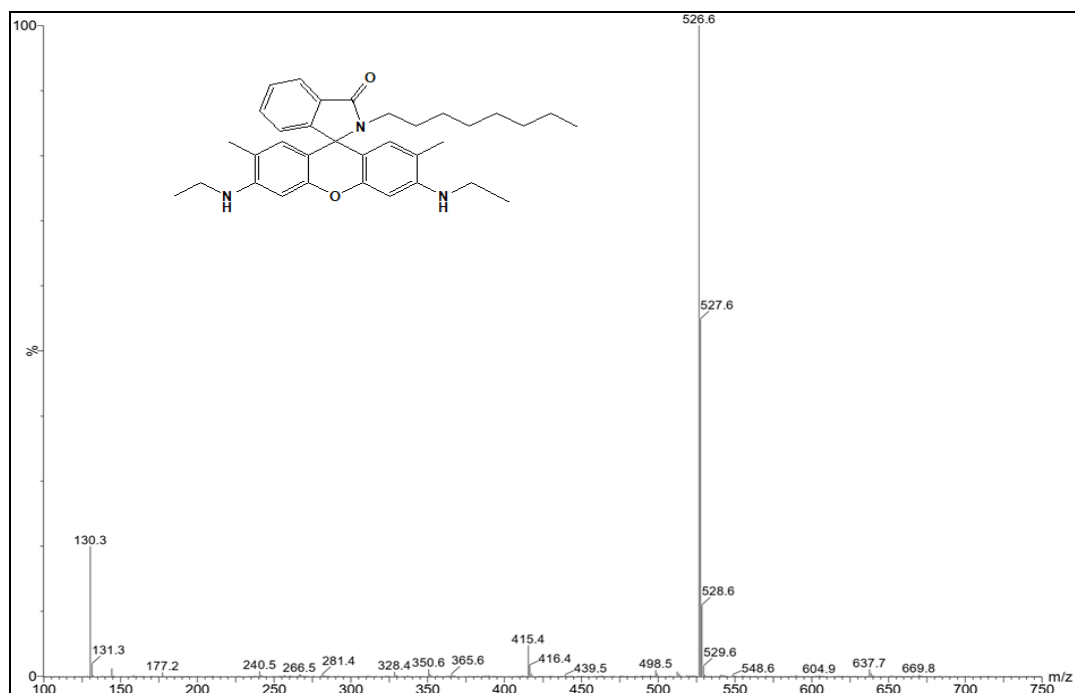

Fig. S19: MS (ESI) spectrum of compound 7.

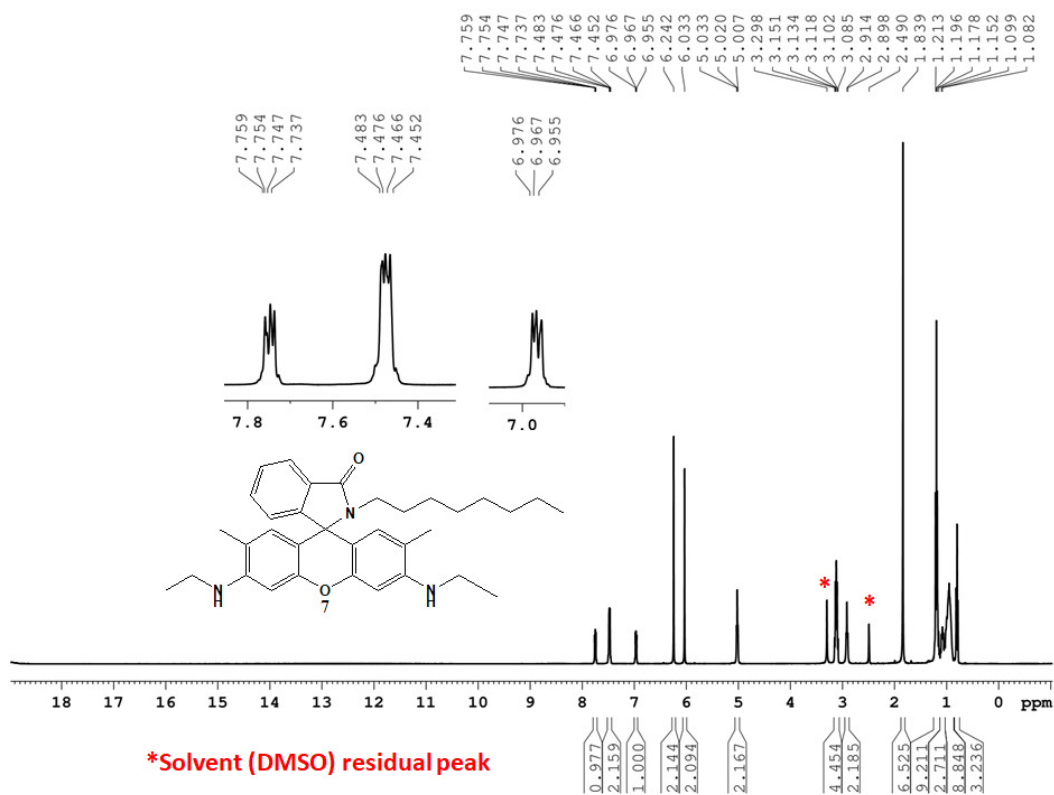

Fig. S20: <sup>1</sup>H NMR spectrum of compound 7 (in DMSO-d<sub>6</sub>)

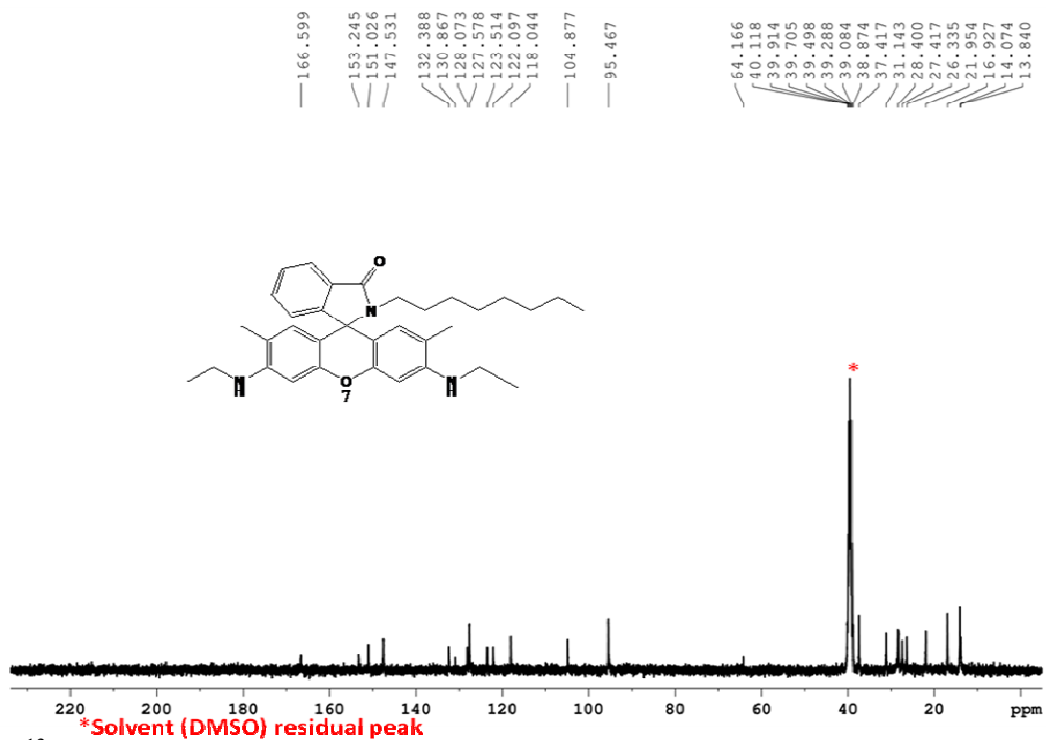

Fig. S21: <sup>13</sup>C NMR spectrum of compound 7 (in DMSO-d<sub>6</sub>).

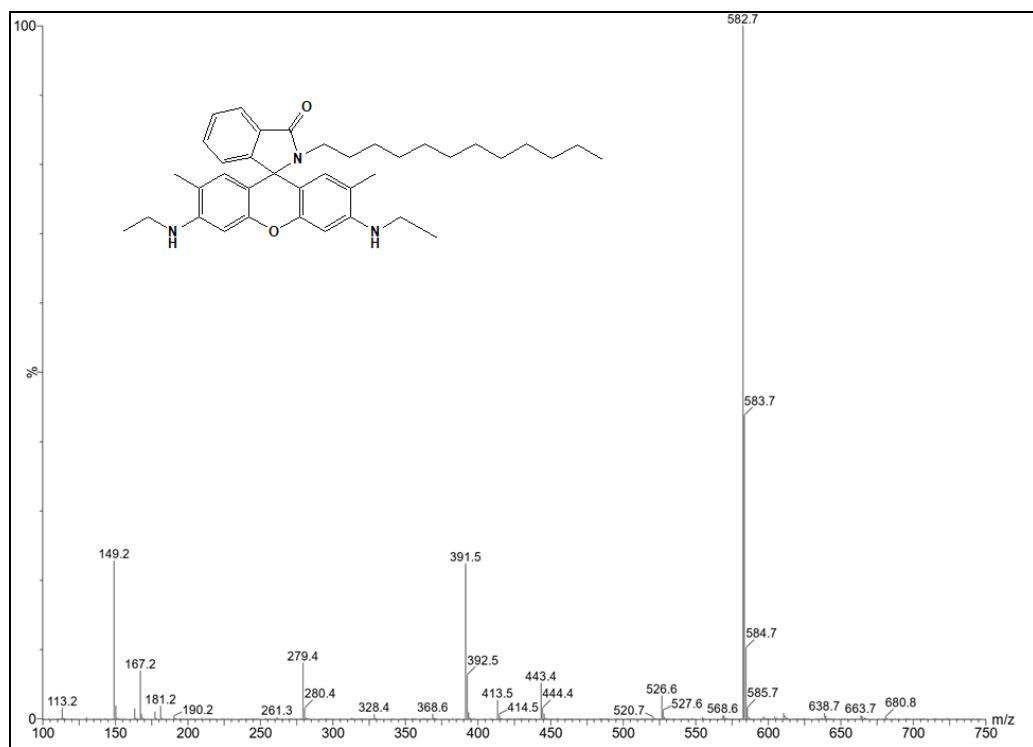

Fig. S22: MS (ESI) spectrum of compound 8.

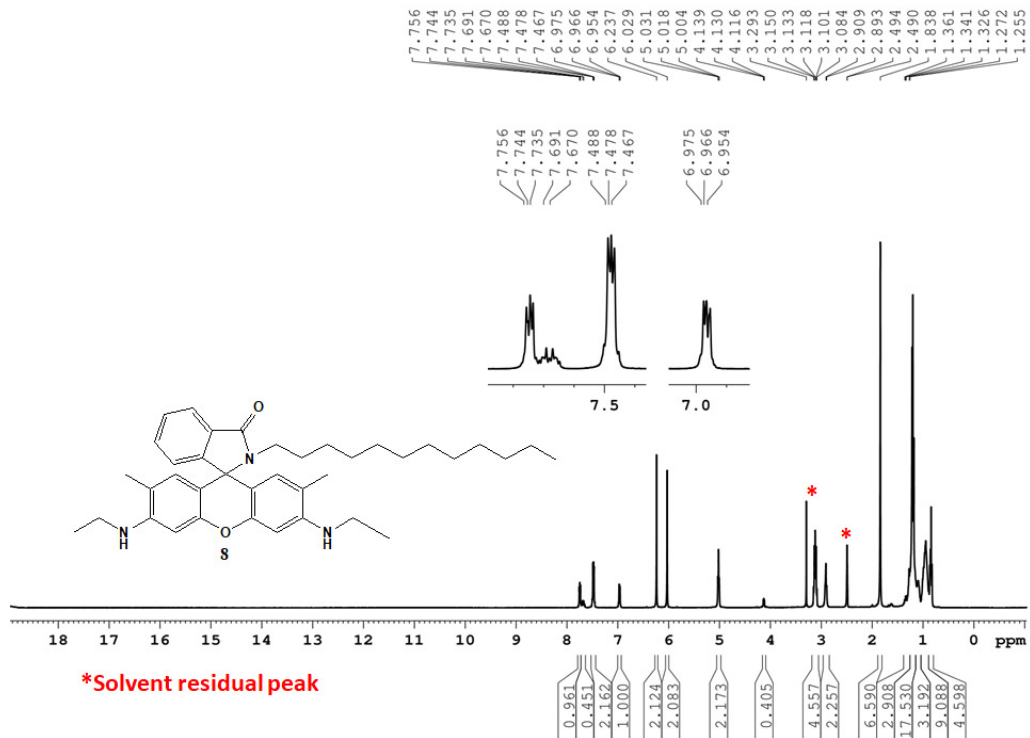

Fig. S23: <sup>1</sup>H NMR spectrum of compound **8** (in DMSO-d<sub>6</sub>)

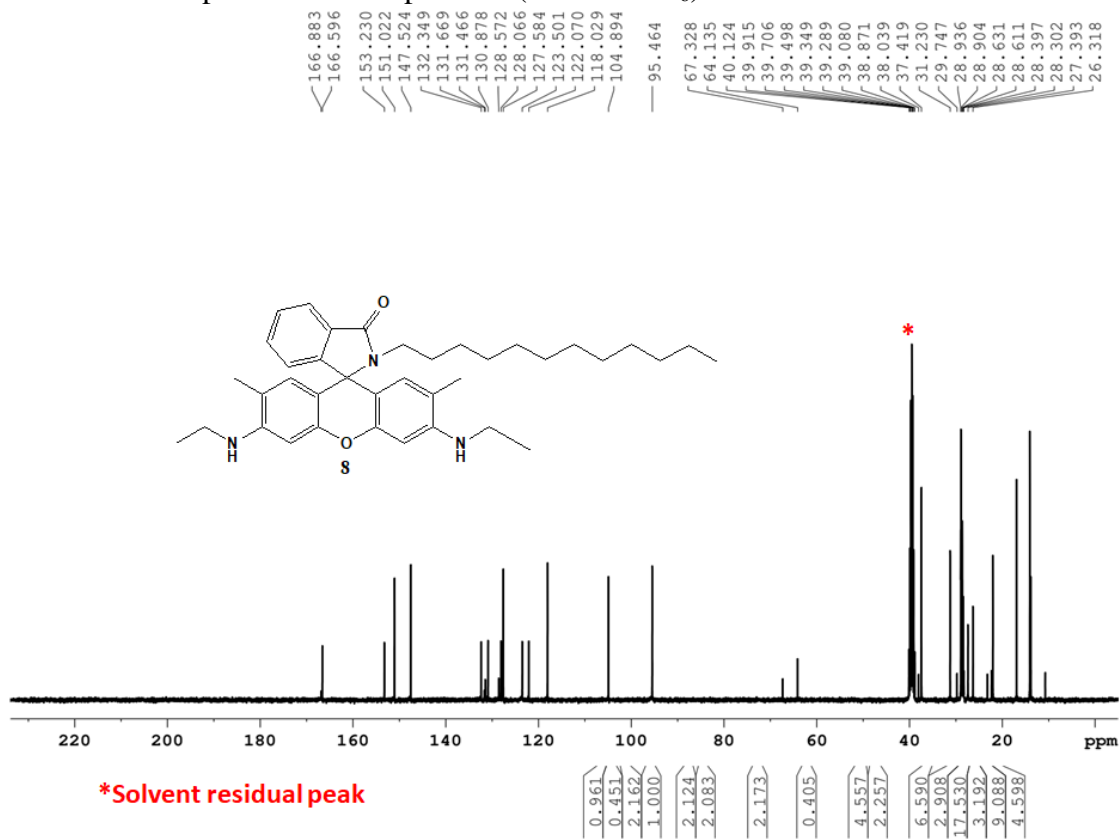

Fig. S24: <sup>13</sup>C NMR spectrum of compound **8** (in DMSO-d<sub>6</sub>).

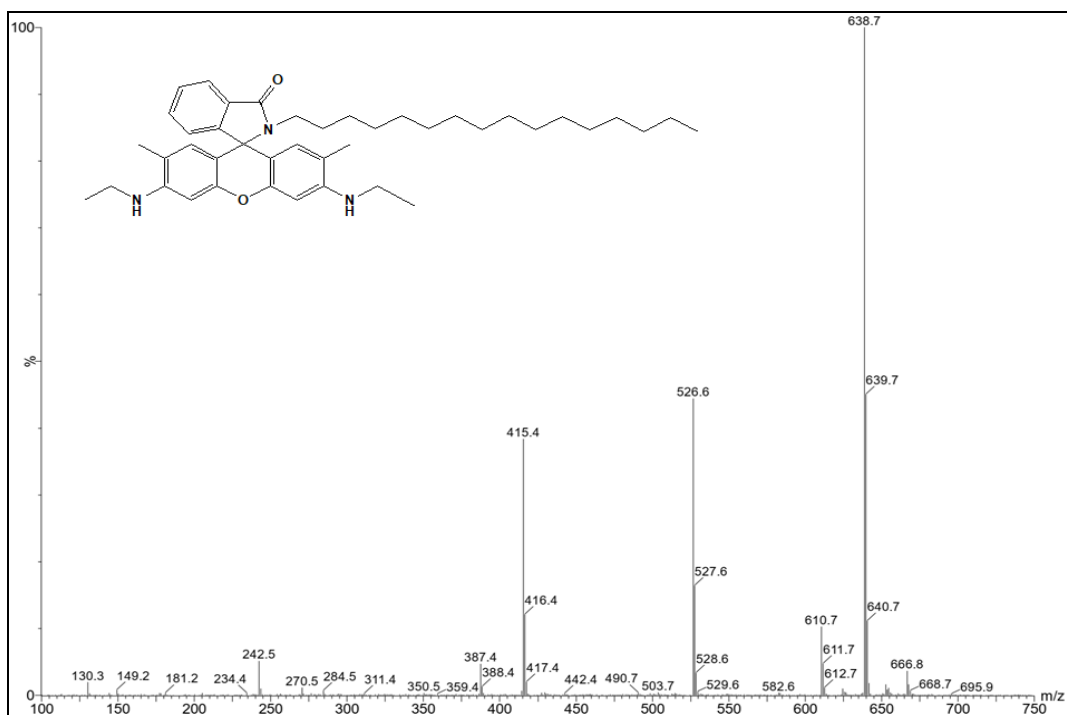

Fig. S25: MS (ESI) spectrum of compound 9.

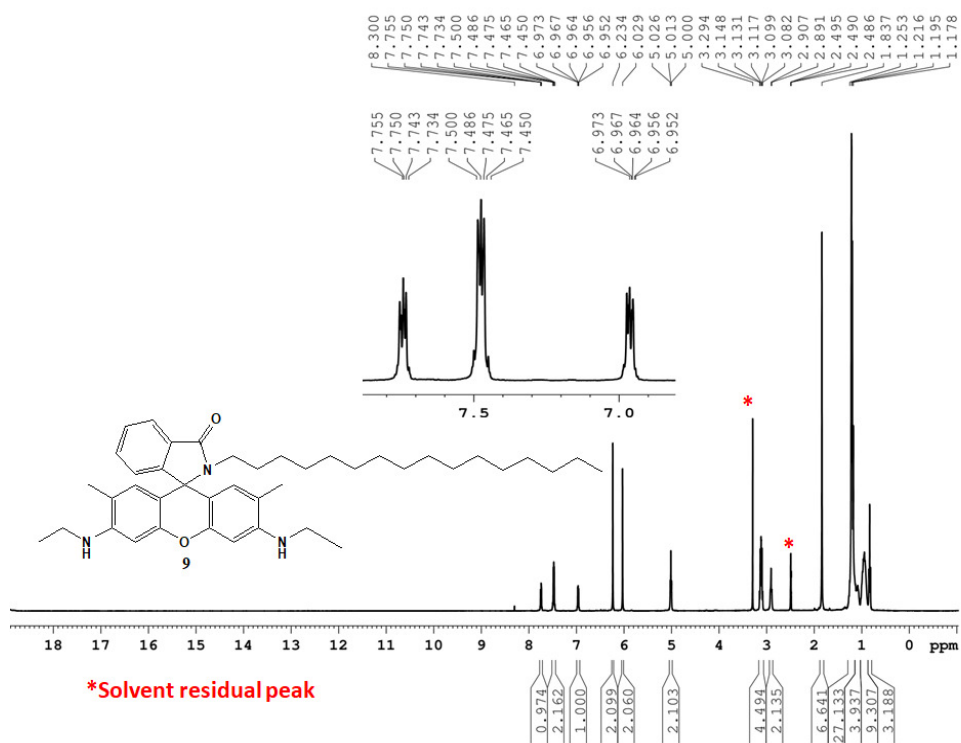

Fig. S26: <sup>1</sup>H NMR spectrum of compound 9 (in DMSO-d<sub>6</sub>)

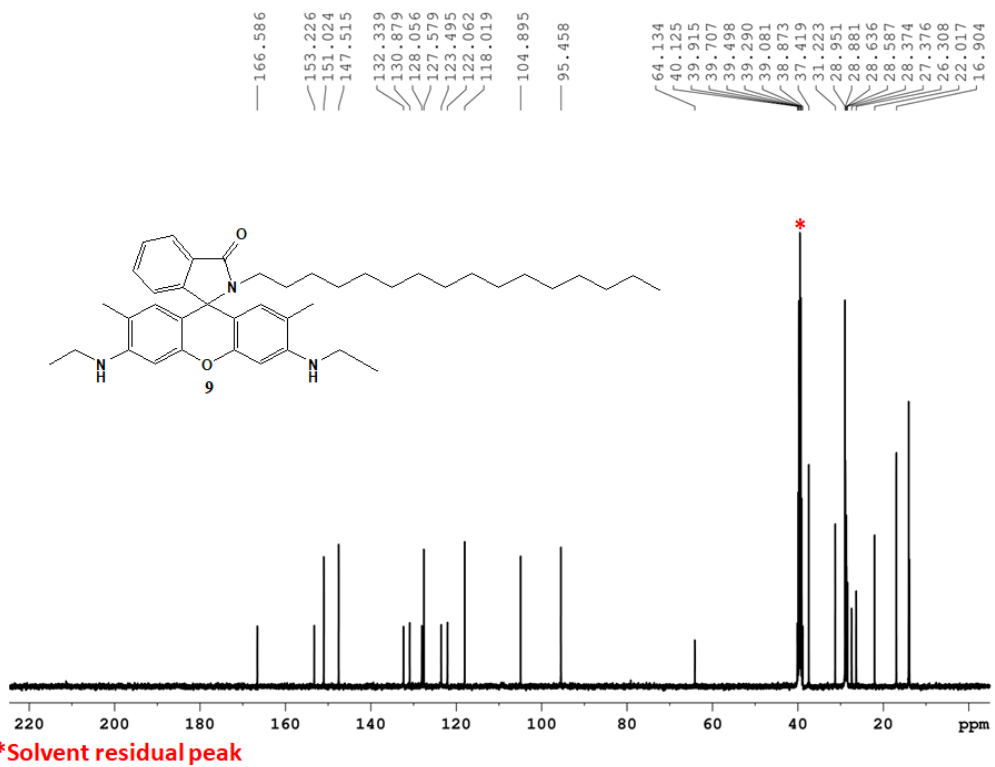

**Fig. S27:** <sup>13</sup>C NMR spectrum of compound **9** (in DMSO-d<sub>6</sub>).

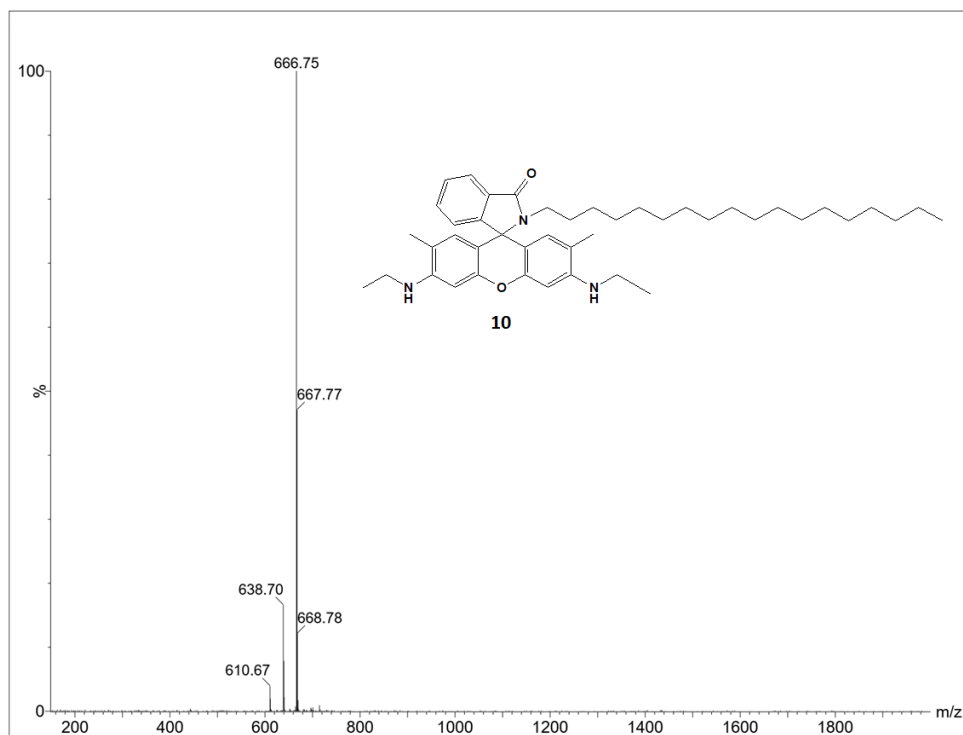

**Fig. S28:** MS (ESI) spectrum of compound **10**.

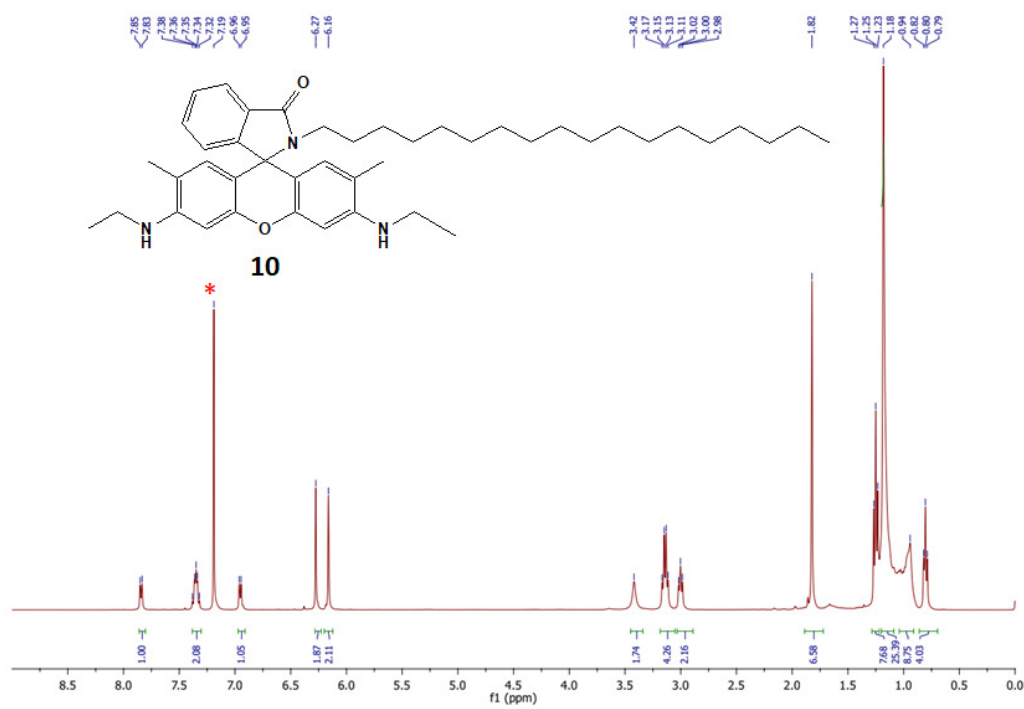

\* Solvent residual peak

Fig. S29:  $^1\text{H}$  NMR spectrum of compound **10** (in  $\text{CDCl}_3$ ).

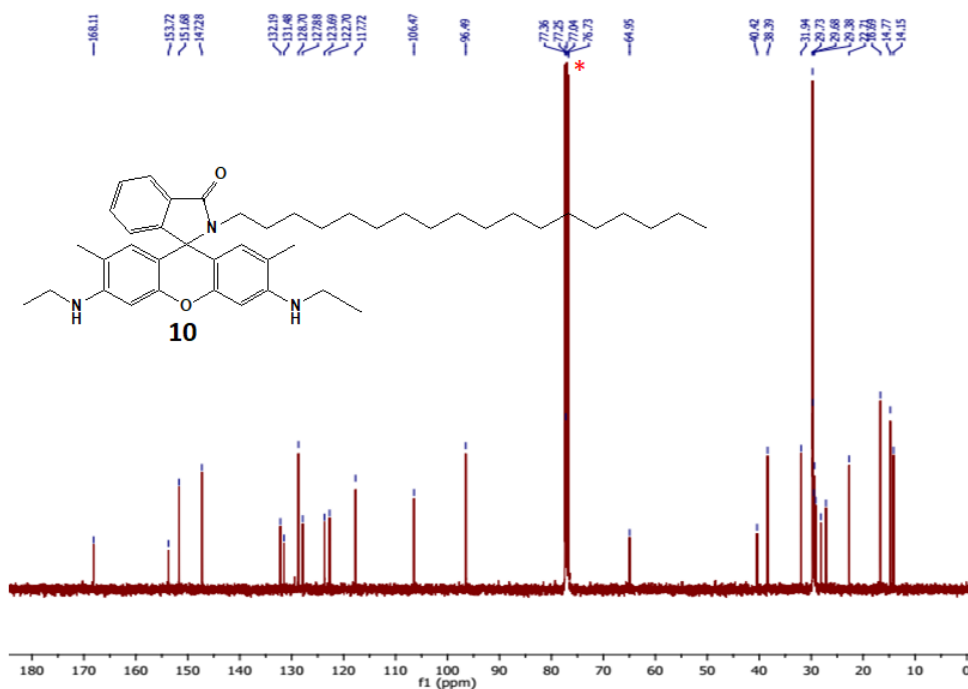

\* Solvent residual peak

Fig. S30:  $^{13}\text{C}$  NMR spectrum of compound **10** (in  $\text{CDCl}_3$ ).



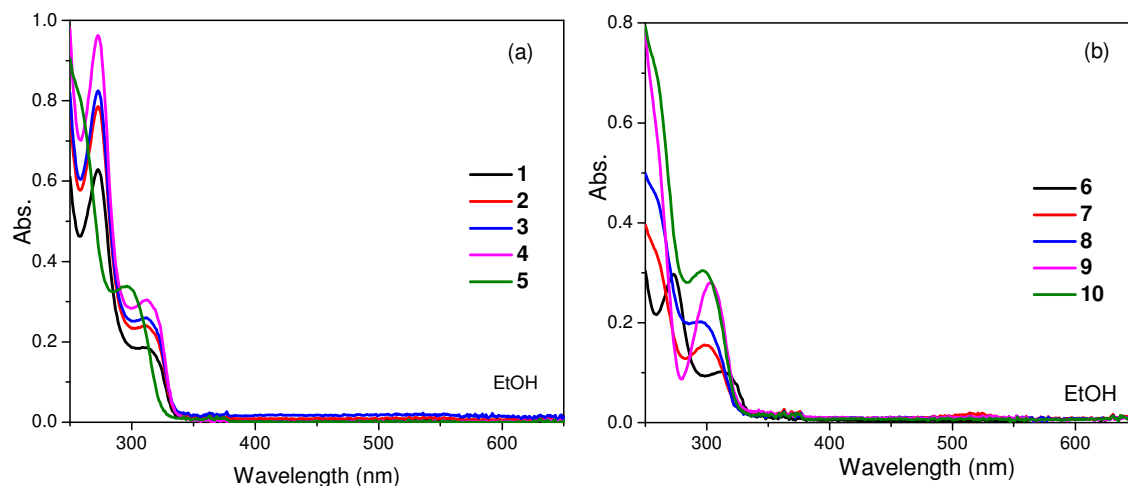

**Fig. S31:** Absorption spectra of (a) **1-5** and (b) **6-10** in EtOH. Conditions: [probe] = 10  $\mu$ M.

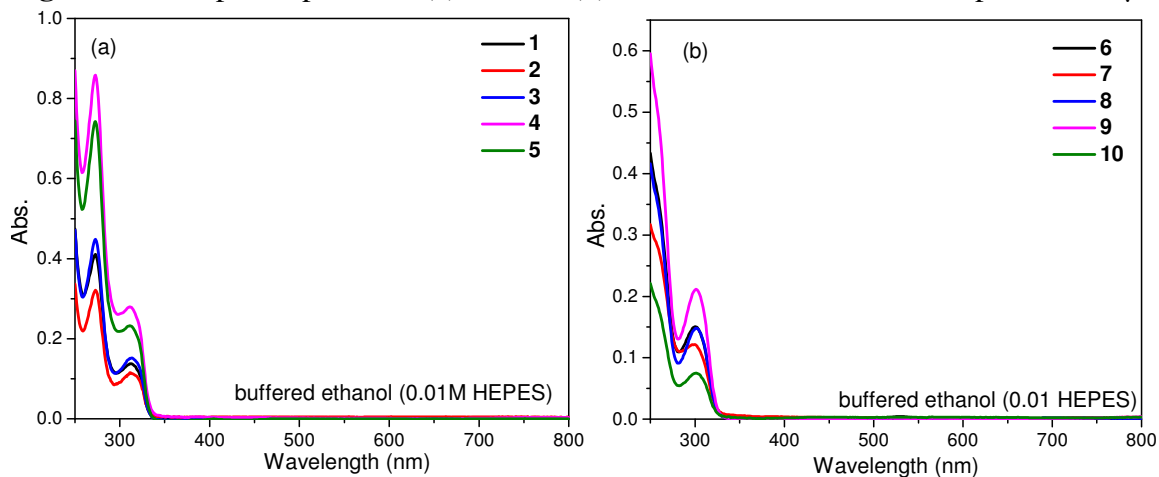

**Fig. S32:** Absorption spectra of (a) **1-5** and (b) **6-10** in buffered EtOH; Cond<sup>n</sup>: [probe] = 10  $\mu$ M.

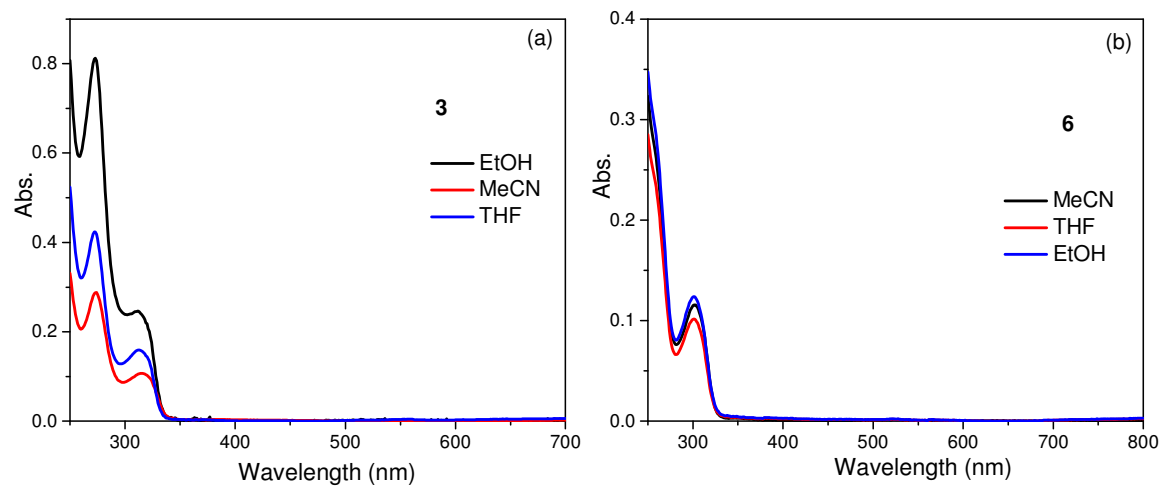

**Fig. S33:** Comparative absorption spectra of (a) **3** and (b) **6** in different organic solvents medium. Conditions: [**3**, **6**] = 10  $\mu$ M.

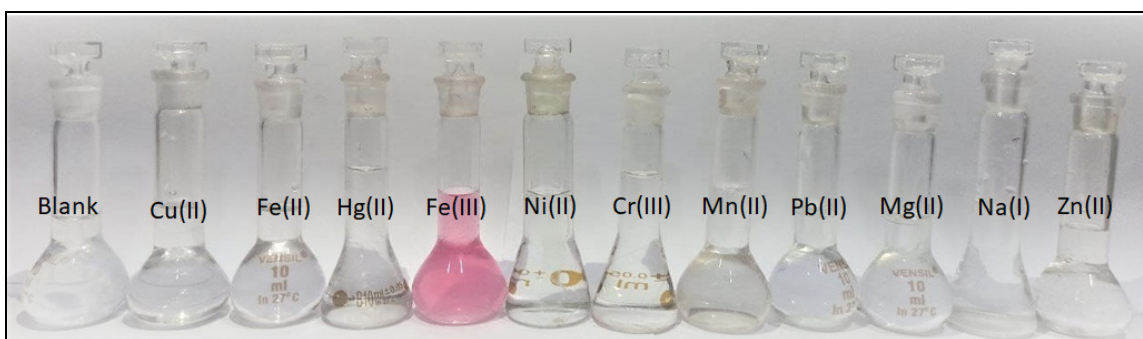

**Fig. S34:** Photograph depicting colorimetric sensing of **1** in presence of various metal ions in EtOH-H<sub>2</sub>O (0.01 M HEPES, 9:1 v/v) medium. [**1**] = 10 μM, [M(I/II/III)] = 100 μM.

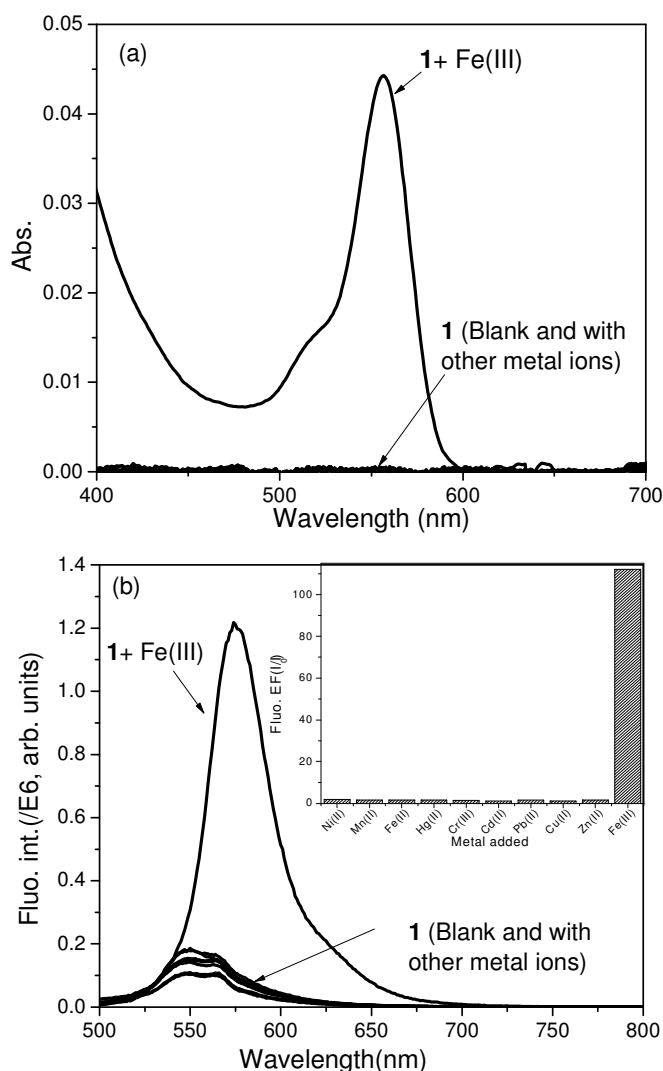

**Fig. S35:** Absorption (a) and steady-state fluorescence (b) spectra of **1** alone and in presence of various metal ions in EtOH-H<sub>2</sub>O (0.01 M HEPES, 9:1 v/v). Conditions: Abs.: [**1**]=10 μM, [M(I/II/III)]=50 μM. Fluo.: [**1**] = 1 μM, [M(I/II/III)] = 10 μM,  $\lambda_{ex}$  = 500 nm, ex. /em. b. p. = 5 nm.

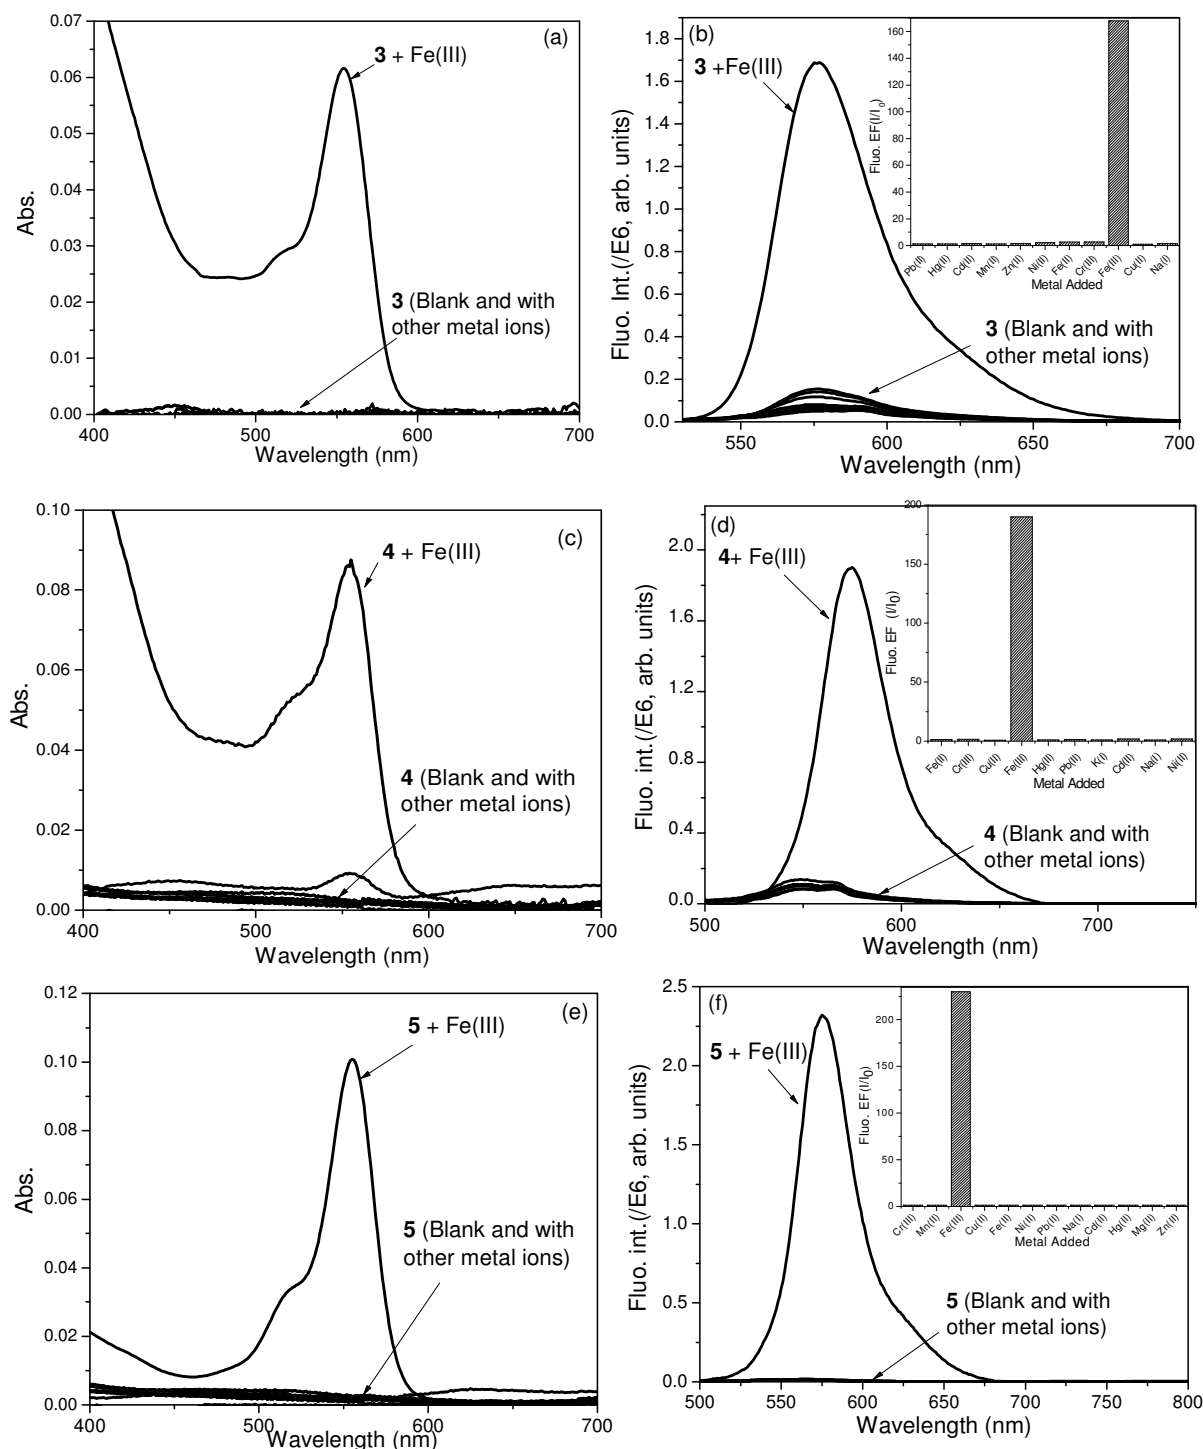

**Fig. S36:** Absorption (a, c, e) and steady-state fluorescence spectra (b, d, f) of **3**, **4**, **5** alone and in presence of various metal ions in EtOH-H<sub>2</sub>O (0.01 M HEPES, 9:1 v/v) medium. Conditions: Abs.: [**3**, **4**, **5**] =  $1 \times 10^{-5}$  M, [M(I/II/III)] =  $1 \times 10^{-4}$  M in all the cases. Fluo.: [**3**, **4**, **5**] =  $1 \times 10^{-6}$  M, [M(I/II/III)] =  $1 \times 10^{-5}$  M,  $\lambda_{\text{ex}}=500\text{nm}$ , RT, ex. and em. b. p. = 5 nm

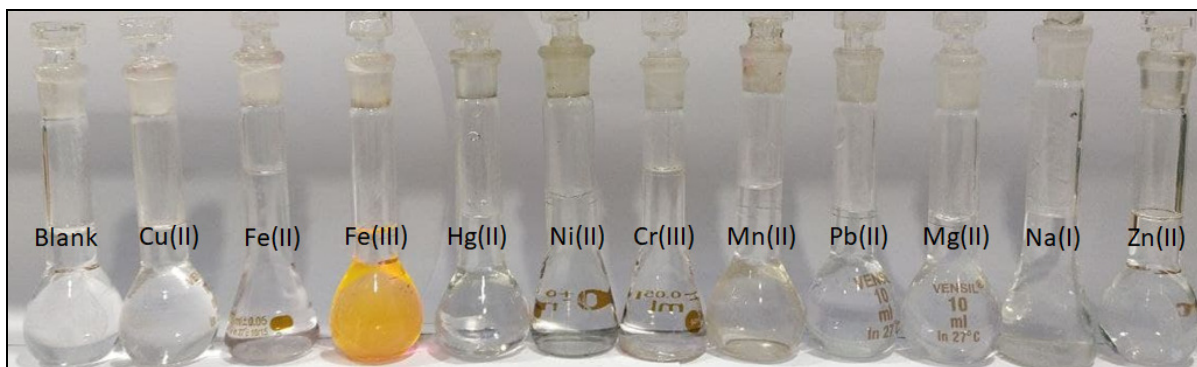

**Fig. S37:** Photograph depicting colour change of the solution of **6** with different metal ions in EtOH-H<sub>2</sub>O (0.01 M HEPES, 9:1 v/v) medium. [**6**] = 10  $\mu$ M, [M(I/II/III)] = 100  $\mu$ M.

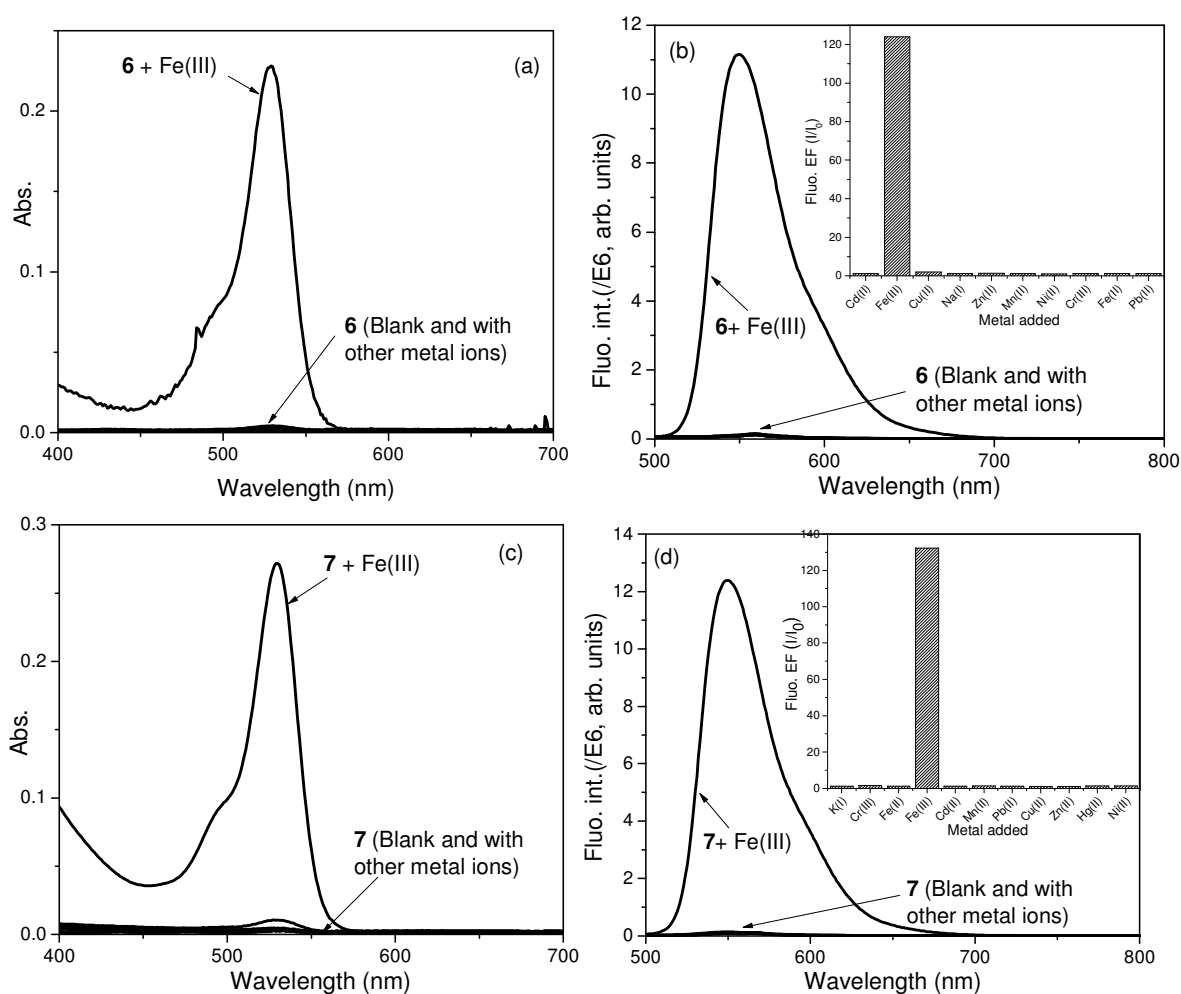

**Fig. S38:** Absorption (a) and steady-state fluorescence (b) spectra of **6** and **7** alone and in presence of various metal ions in EtOH-H<sub>2</sub>O (0.01 M HEPES, 9:1 v/v) medium. Conditions: Abs.: [**7**] =  $1 \times 10^{-5}$  M, [M(I/II/III)] =  $1 \times 10^{-4}$  M in all the cases. Fluo.: [**7**] =  $1 \times 10^{-6}$  M, [M(I/II/III)] =  $1 \times 10^{-5}$  M,  $\lambda_{ex}$  = 500 nm, RT, ex. and em. b. p. = 5 nm.

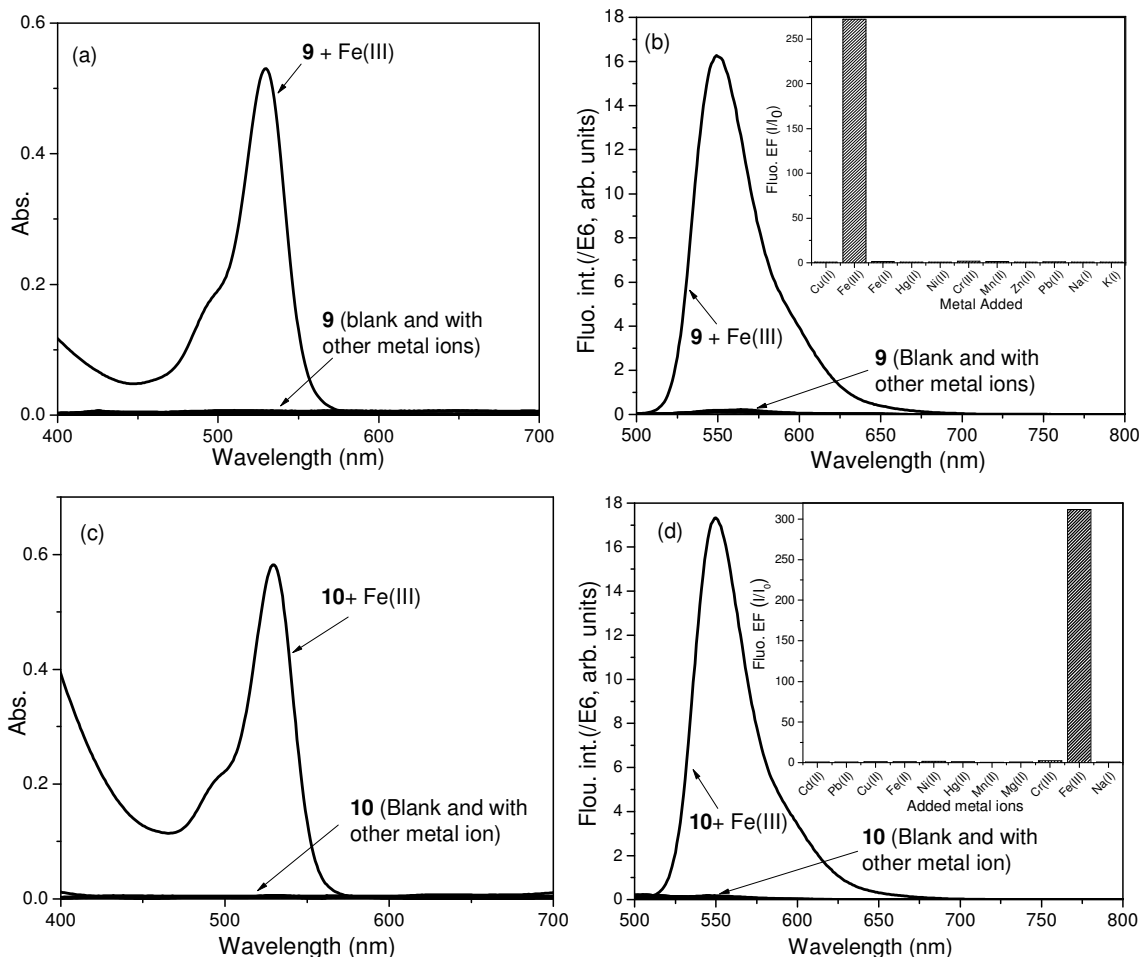

**Fig. S39:** Absorption (a, c) and steady-state fluorescence spectra (b, d) of **9** (a, b) and **10** (c, d) alone and in presence of various metal ions in EtOH-H<sub>2</sub>O (0.01 M HEPES, 9:1 v/v) medium. Conditions: Abs.: [**9**, **10**] =  $1 \times 10^{-5}$  M, [M(I/II/III)] =  $1 \times 10^{-4}$  M. Flu.: [**9**, **10**] =  $1 \times 10^{-6}$  M, [M(I/II/III)] =  $1 \times 10^{-5}$  M,  $\lambda_{\text{ex}}=500$  nm, RT, ex. and em. b. p. = 5 nm.

**Table ST1:** Fit-results to the exponential decay curve of **1-3** with and without Fe(III) ions, obtained with time-correlated single photon counting technique which were best-fitted to the bi-exponential fit equation  $A+B_1 \exp(-t/\tau_1) + B_2 \exp(-t/\tau_2)$ .

| Parameters               | <b>1</b>        | <b>1 + Fe(III)</b> | <b>2</b>        | <b>2 + Fe(III)</b> | <b>3</b>        | <b>3 + Fe(III)</b> |
|--------------------------|-----------------|--------------------|-----------------|--------------------|-----------------|--------------------|
| $\tau_1$ , ns<br>(Rel %) | 2.35<br>(92.96) | 2.49<br>(94.45)    | 2.29<br>(94.08) | 2.59<br>(95.84)    | 2.27<br>(92.92) | 2.57<br>(96.23)    |
| $\tau_2$ , ns<br>(Rel %) | 0.13<br>(7.04)  | 0.149<br>(5.55)    | 0.14<br>(5.92)  | 0.22<br>(4.16)     | 0.13<br>(7.08)  | 0.19<br>(3.77)     |
| B1                       | 5193.180        | 5392.744           | 5582.376        | 5661.601           | 4883.592        | 5510.361           |
| B2                       | 75.383          | 49.808             | 61.777          | 24.682             | 72.169          | 25.466             |
| A                        | 9.318           | 7.842              | 9.075           | 7.124              | 9.886           | 7.484              |
| $\chi^2$                 | 1.267           | 1.136              | 1.249           | 1.254              | 1.108           | 1.157              |

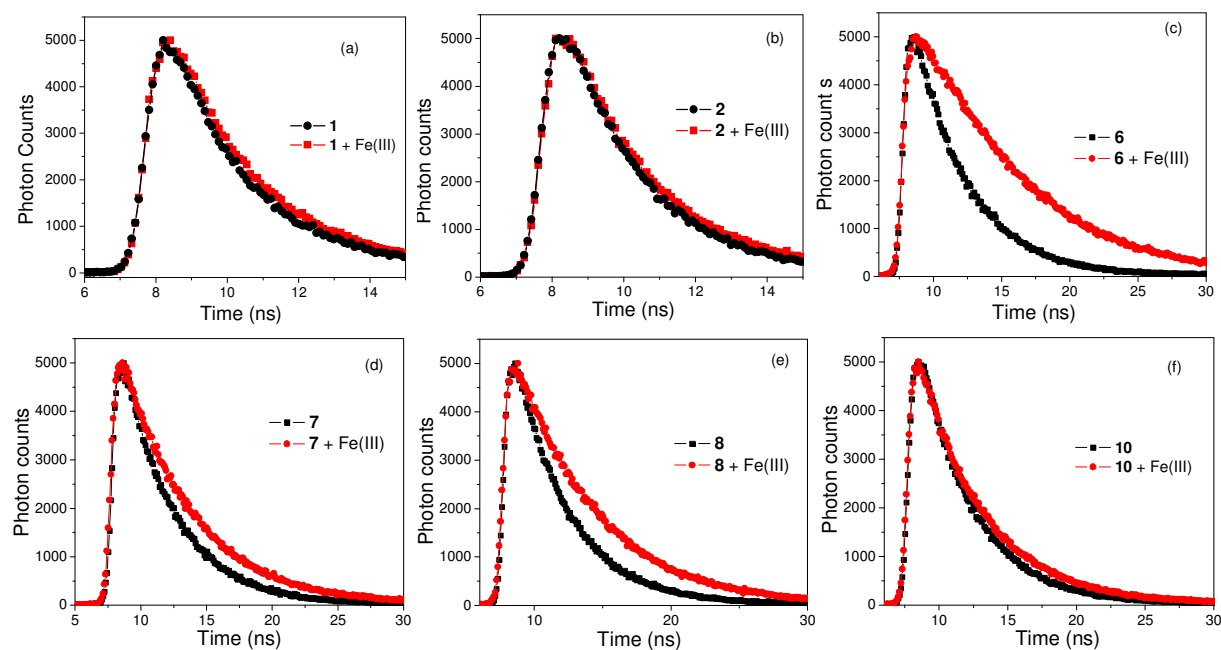

**Fig. 40:** (a) Fluorescence decay (TCSPC) profile of few probes alone and in presence of Fe(III) (1:1 stoichiometry) in EtOH-H<sub>2</sub>O (0.01M HEPES, 9:1 v/v) medium. [L] = 1  $\mu$ M,  $\lambda_{\text{ex}}$  = 480 nm,  $\lambda_{\text{em}}$  = 580 nm.

**Table ST2:** Fit-results to the exponential decay curve of **6-10** with and without Fe(III) ions, obtained with time-correlated single photon counting technique which were best-fitted to the bi-exponential fit equation  $A+B_1 \exp(-t/\tau_1) + B_2 \exp(-t/\tau_2)$ .

| Parameters               | <b>6</b>       | <b>6+Fe(III)</b> | <b>7</b>        | <b>7+Fe(III)</b> | <b>8</b>        | <b>8+Fe(III)</b> | <b>10</b>       | <b>10+Fe(III)</b> |
|--------------------------|----------------|------------------|-----------------|------------------|-----------------|------------------|-----------------|-------------------|
| $\tau_1$ , ns<br>(Rel %) | 3.83<br>(96.1) | 7.21<br>(100)    | 3.88<br>(96.32) | 5.29<br>(100)    | 3.86<br>(95.95) | 5.76<br>(89.16)  | 3.88<br>(96.49) | 4.62<br>(96.83)   |
| $\tau_2$ , ns<br>(Rel %) | 0.22<br>(3.93) | -                | 0.22<br>(3.68)  | 2.00<br>(0.00)   | 0.27<br>(4.05)  | 0.05<br>(10.84)  | 0.23<br>(3.51)  | 0.22<br>(3.17)    |
| B1                       | 5177.809       | 5655.364         | 5026.653        | 0.000            | 5173.701        | 5053.483         | 5370.329        | 5119.308          |
| B2                       | 35.614         | -                | 33.621          | 5107.912         | 31.317          | 22.786           | 32.615          | 34.378            |
| A                        | 12.400         | 24.970           | 11.609          | 17.708           | 10.647          | 4.447            | 11.990          | 13.310            |
| $\chi^2$                 | 1.168          | 2.385            | 1.156           | 1.321            | 1.117           | 1.193            | 1.069           | 1.132             |

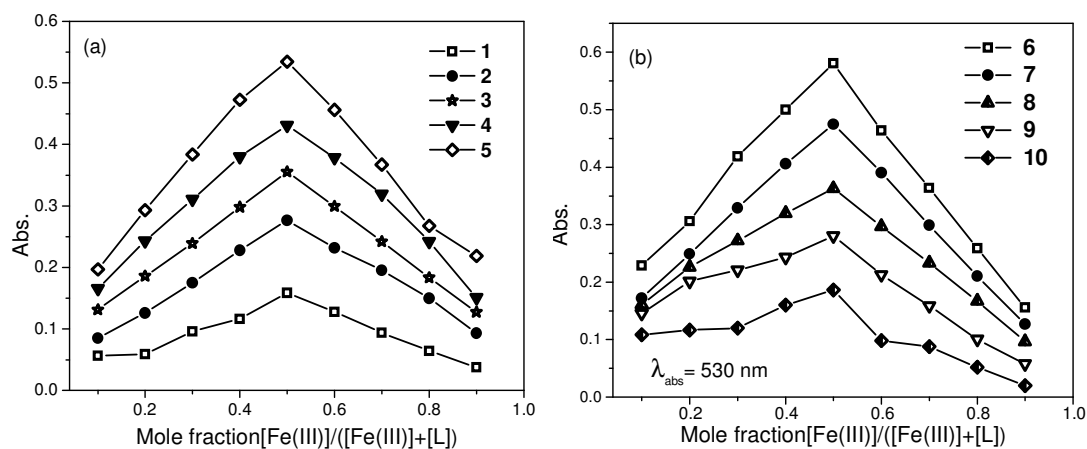

**Fig. S41:** Change in absorbance of these probes at their absorption maxima ( $\lambda_{\text{abs}} = 550 \text{ nm}$  for **1-5** (a) and  $\lambda_{\text{abs}} = 530 \text{ nm}$  for **6-10** (b)) as a function of mole fractions of added Fe(III) in EtOH-H<sub>2</sub>O (0.01M HEPES, 9:1 v/v) showing 1:1 complexation stoichiometry (Job's plot).

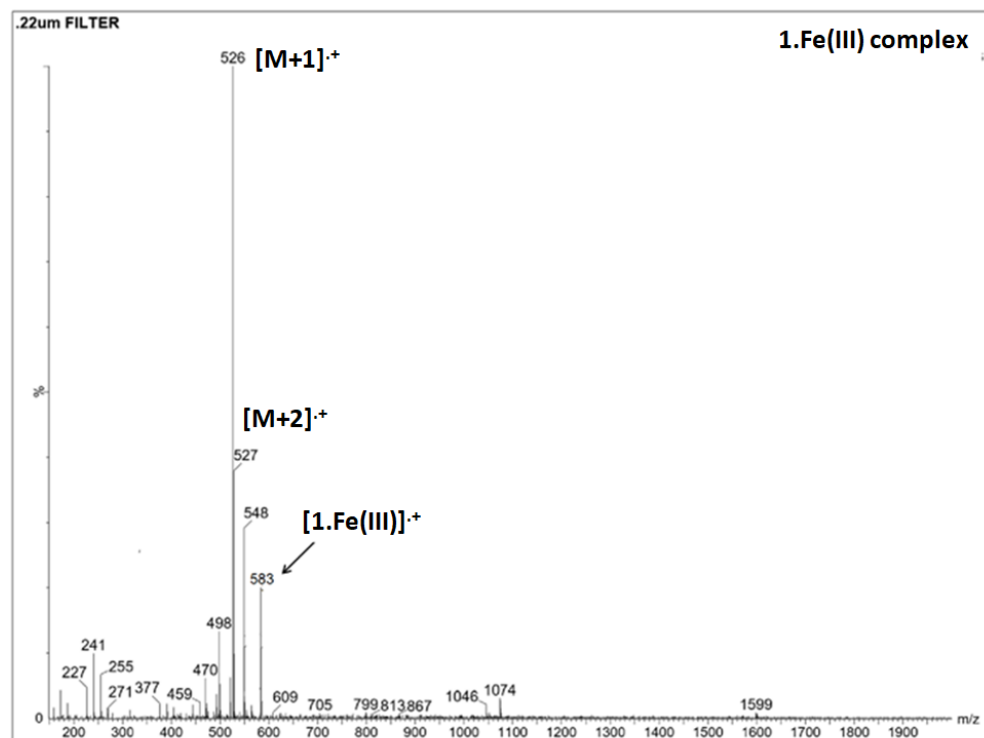

**Fig. S42:** MS (ESI) spectrum of **1**:Fe(III) complex.

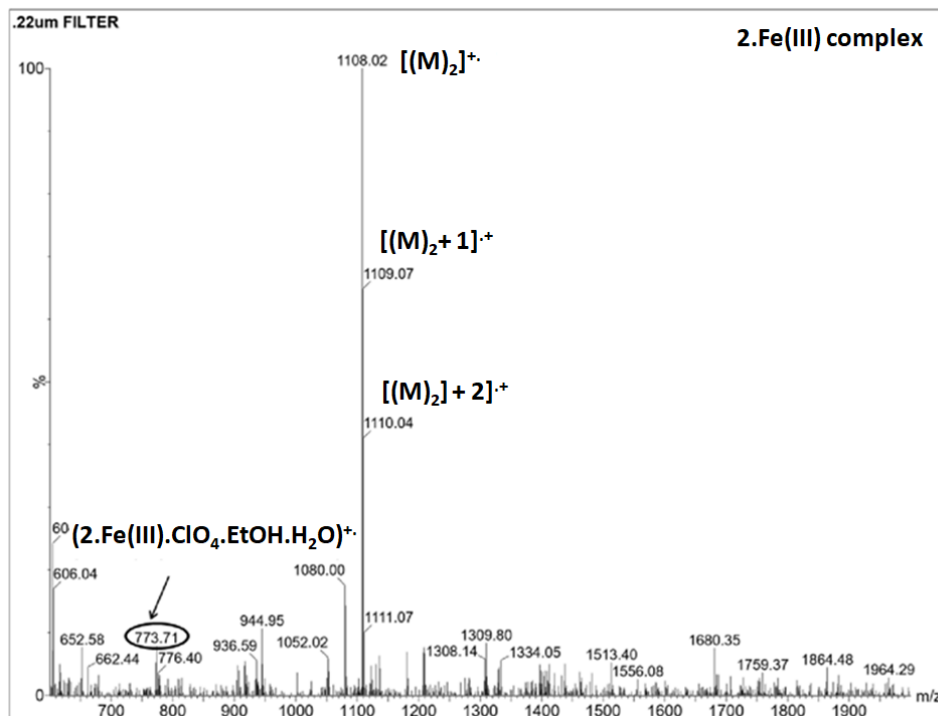

Fig. S43: MS (ESI) spectrum of 2cFe(III) complex.

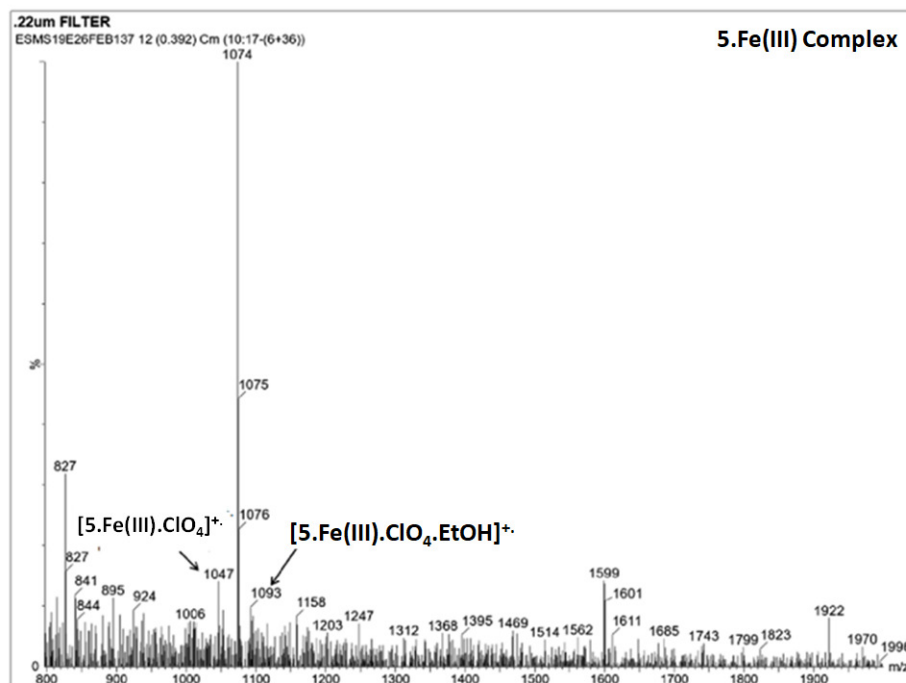

Fig. S 44: MS (ESI) spectrum of 5cFe(III) complex.



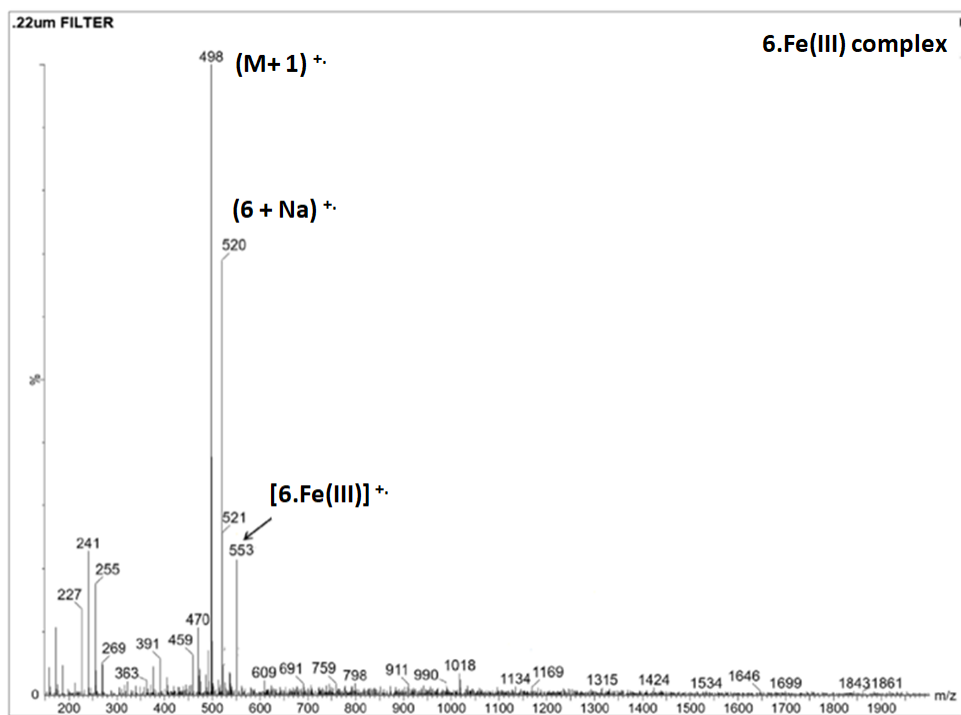

Fig. S45: MS (ESI) spectrum of 6-Fe(III) complex

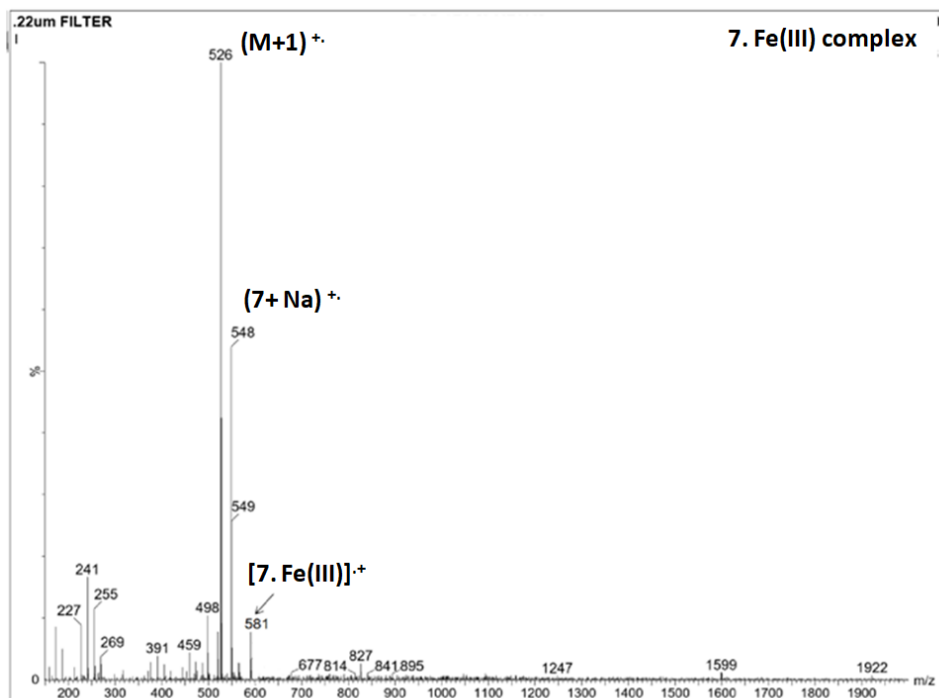

Fig. S46: MS (ESI) spectrum of 7-Fe(III) complex.

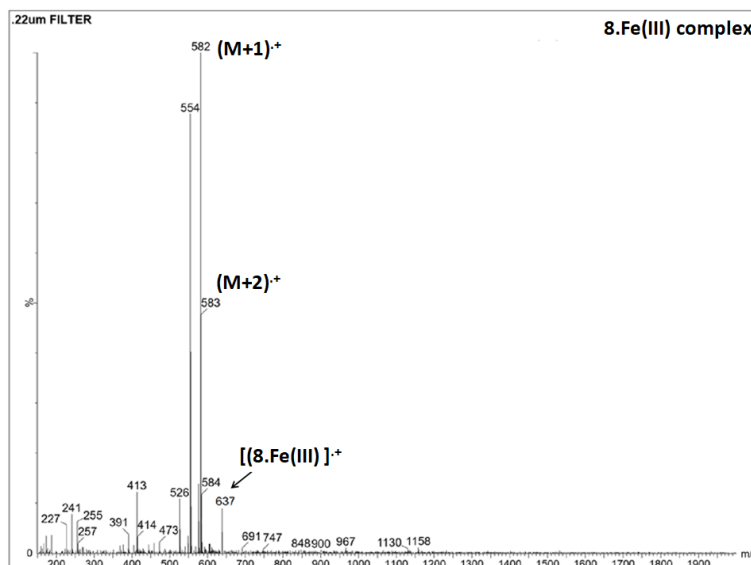

**Fig. S47:** MS (ESI) spectrum of **8**-Fe(III) complex.

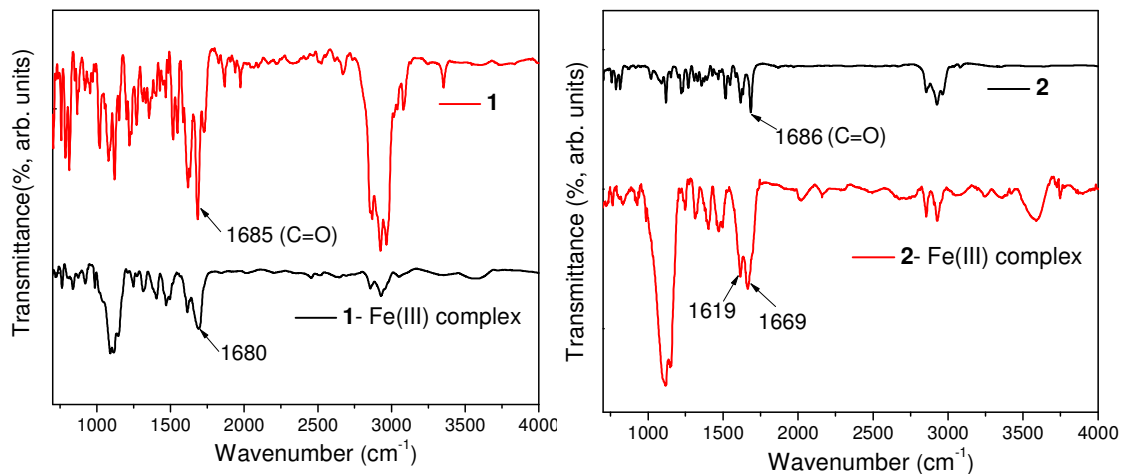

**Fig. S48:** FTIR-spectra of **1** and **2** with their corresponding Fe(III)-complexes (isolated solids).

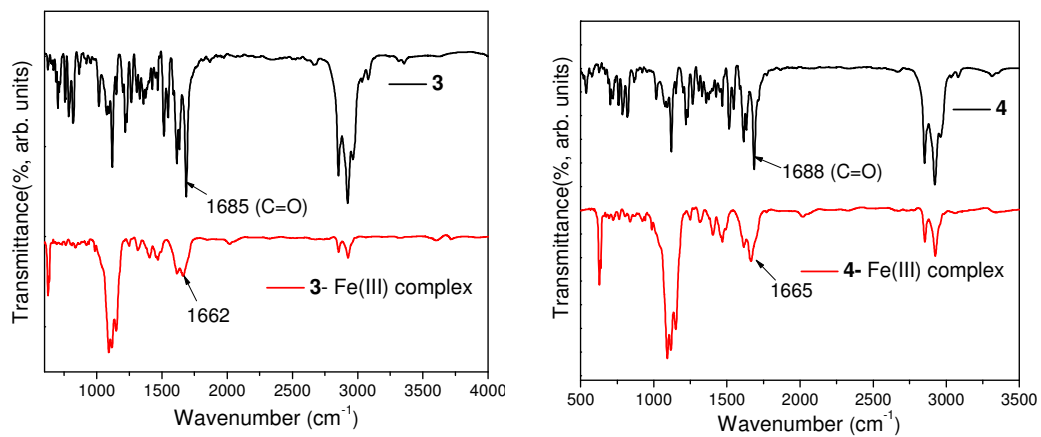

**Fig. S49:** FTIR-spectra of **3** and **4** with their corresponding Fe(III)-complexes (isolated solids).

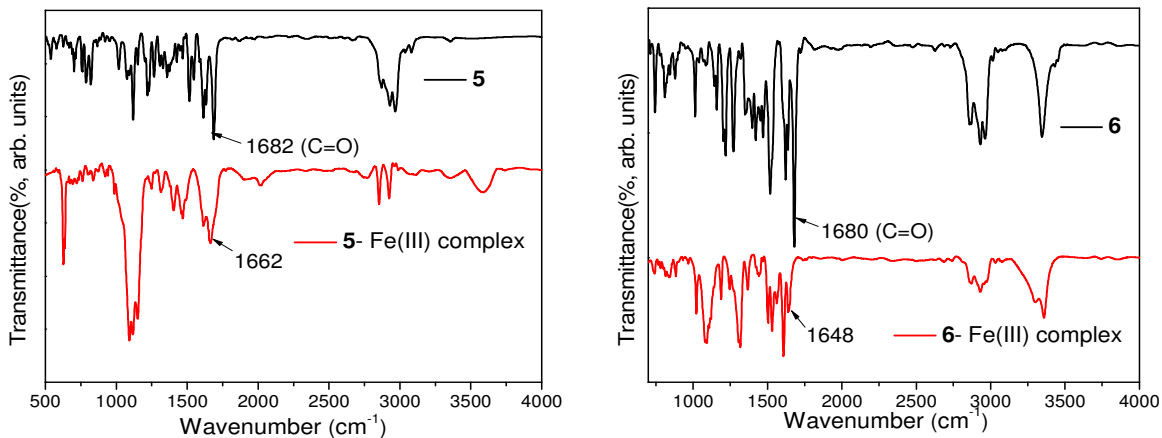

**Fig. S50:** Comparison between FTIR-spectra of **5** and **6** with their corresponding Fe(III)-complexes (isolated solids).

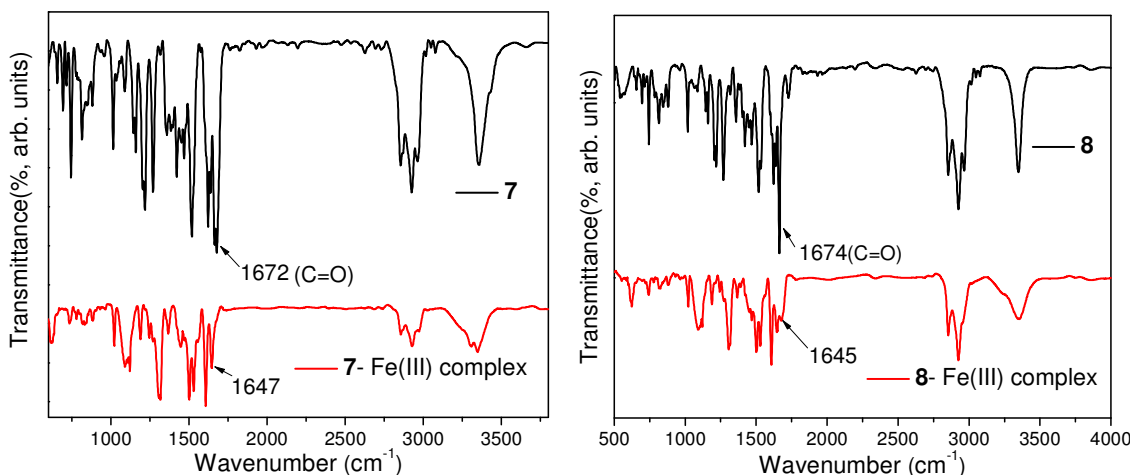

**Fig. S51:** Comparison between FTIR-spectra of **7** and **8** with those of their respective Fe(III)-complexes (isolated solids).

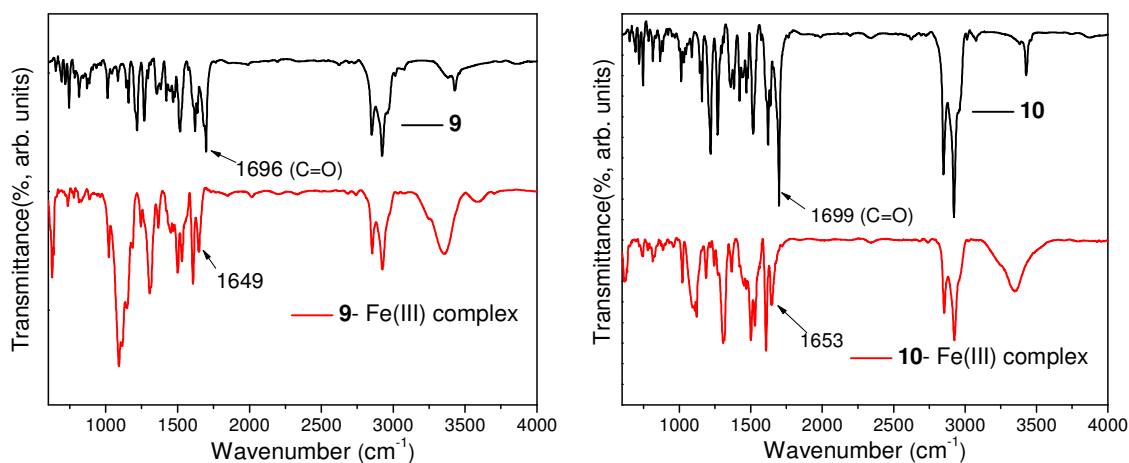

**Fig. S52:** Comparison between FTIR-spectra of **9** and **10** with those of their corresponding Fe(III)-complexes (isolated solids).

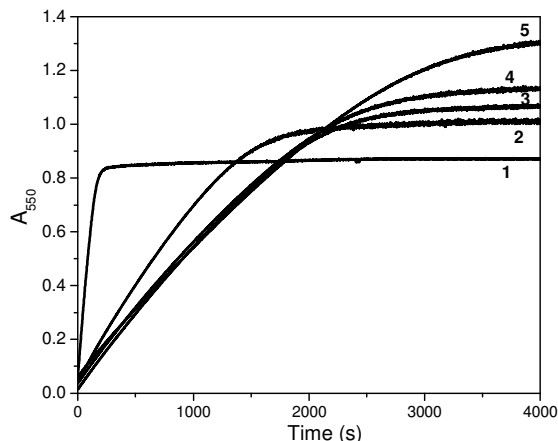

**Fig. S53:** Absorption spectral responses ( $\lambda_{\text{abs}} = 530 \text{ nm}$ ) of substituted Rhodamine B based probes (**1-5**) as a function of time (s) on addition of equimolar Fe(III) ion to probes' solutions.

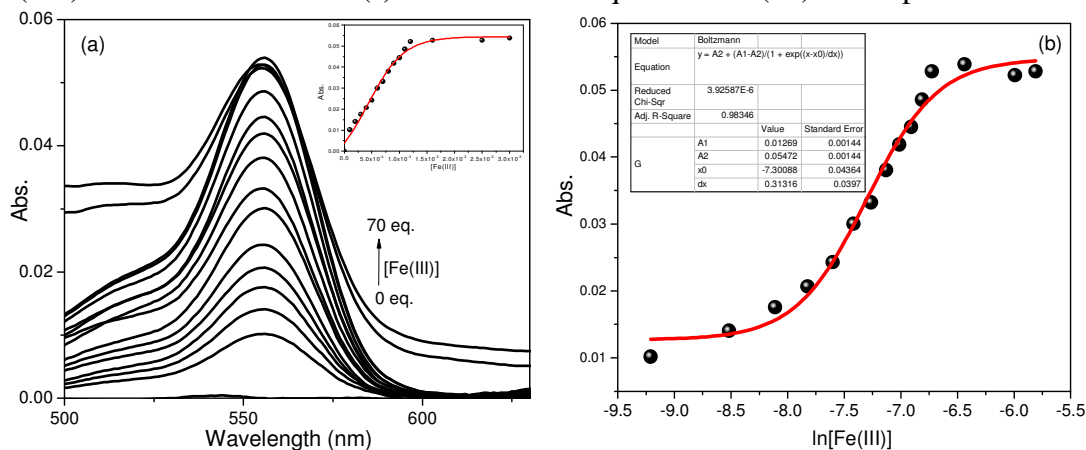

**Fig. S54:** (a) Absorption titrations of **1** with Fe(III) ions in EtOH-H<sub>2</sub>O (0.01M HEPBS, 9:1 v/v) medium and (b) its corresponding intensity versus concentration ( $\ln[\text{Fe(III)}]$ ) plots for determination of association constant ( $K_a$ ). [**1**] =  $1 \mu\text{M}$  (abs.).

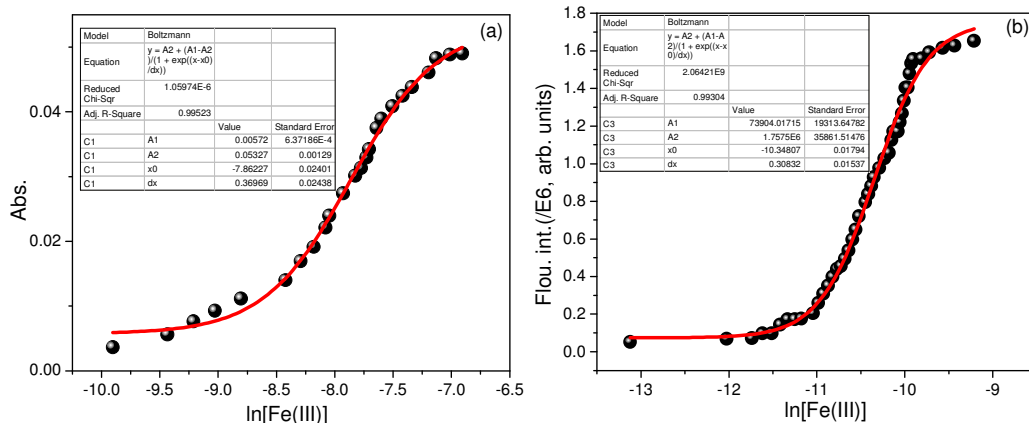

**Fig. S55:** Non-linear fit to the plot of (a) absorbance and (b) fluorescence of **2** as a function of concentrations of Fe(III) added ( $\ln \text{Fe(III)}$ ) for determination of association constant ( $K_a$ ) of complexation. The graphs of absorption and fluorescence titrations are given in the main text.

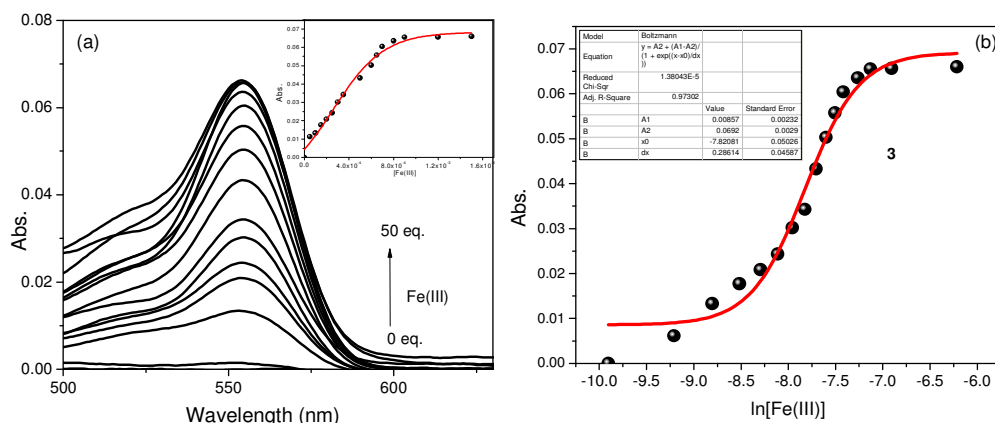

**Fig. S56:** (a) Absorption spectra of **3** in presence of Fe(III) ions in EtOH-H<sub>2</sub>O (0.01M HEPBS, 9:1 v/v) medium, and (b) non-linear regression to the plot its corresponding intensity versus concentration (ln[Fe(III)]) for determination of Ka. [**3**] = 1 μM (abs.).

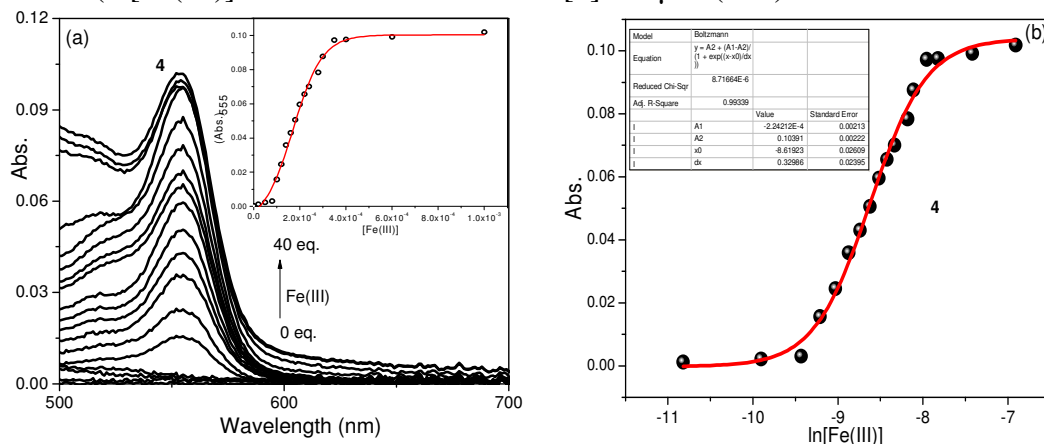

**Fig. S57:** (a) Absorption titrations of **4** with Fe(III) ions in EtOH-H<sub>2</sub>O (0.01M HEPBS, 9:1 v/v), (b) non-linear regression to the plot of its corresponding intensity versus concentration (ln[Fe(III)]) for determination of Ka. [**4**] = 1 μM (Abs.).

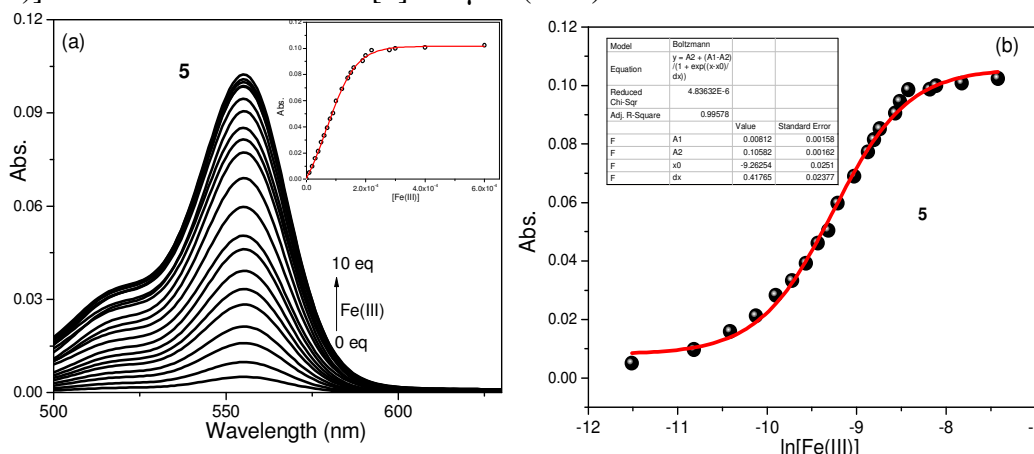

**Fig. S58:** (a) Absorption titrations of **5** with Fe(III) ions in EtOH-H<sub>2</sub>O (0.01M HEPBS, 9:1 v/v), (b) non-linear regression to the plot of its corresponding intensity versus concentration (ln[Fe(III)]) for determination of Ka. [**5**] = 1 μM (abs.).

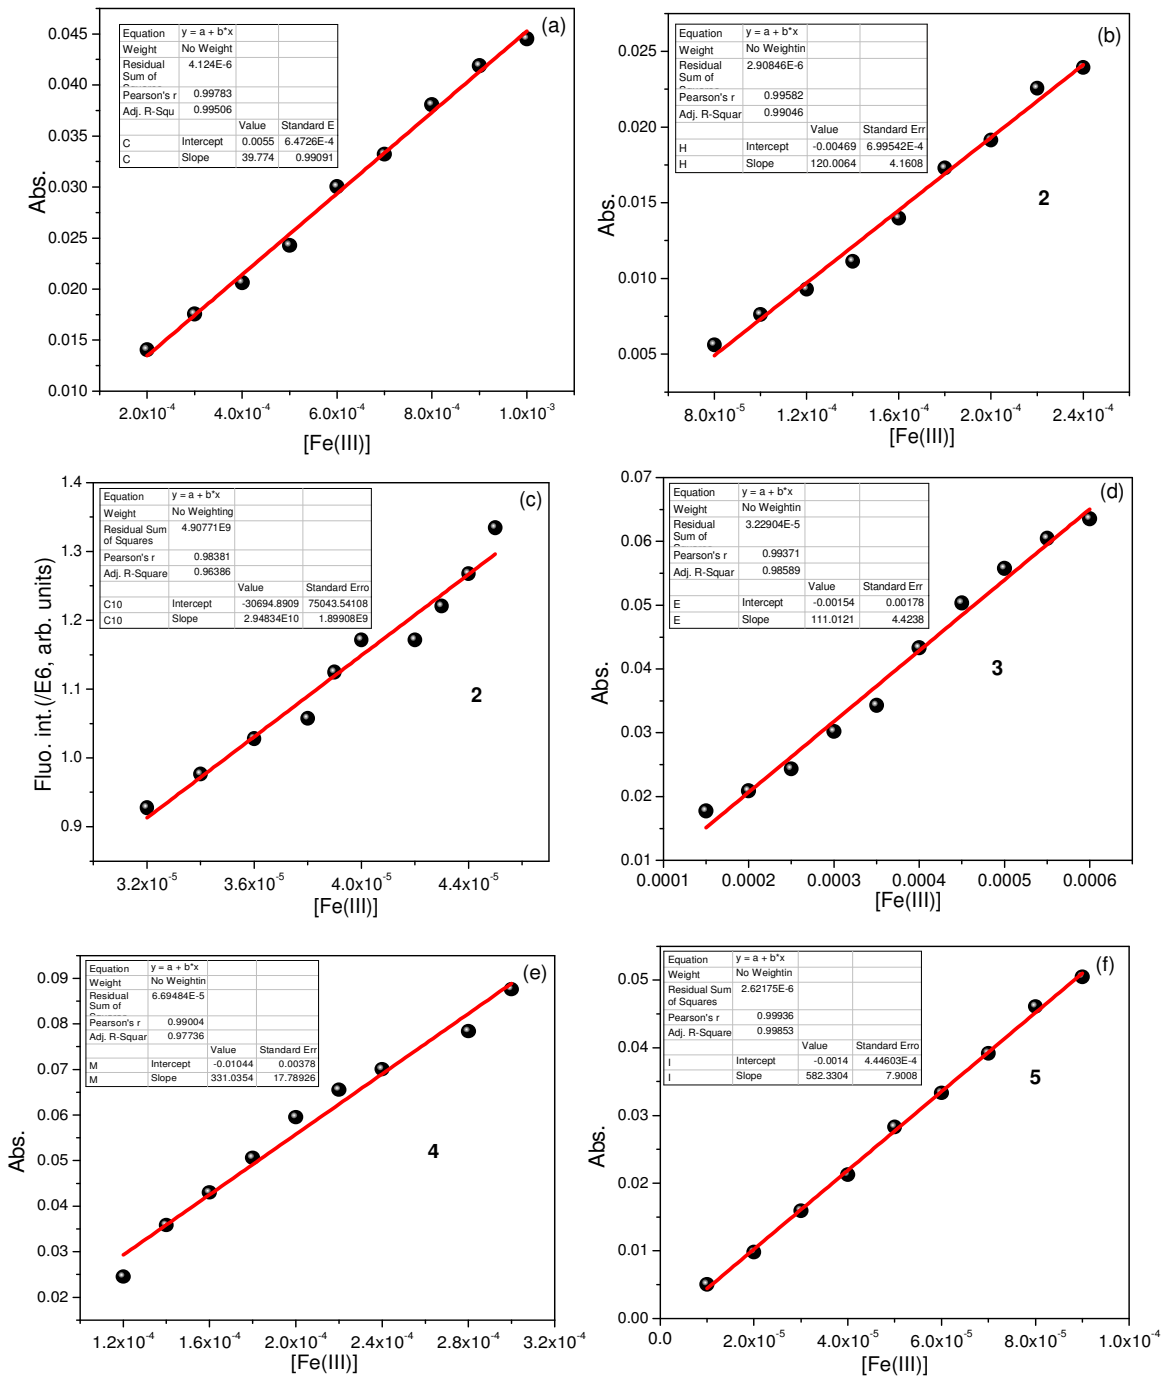

**Fig. S59:** Linear regression to the plot of absorbance of **1**, **2**, **3**, **4** and **5** (a, b, d, e, and f, respectively) and fluorescence spectral intensities of **2** (c) on addition of added Fe(III) ion for determination of the sensitivity of detection (S/N=5).

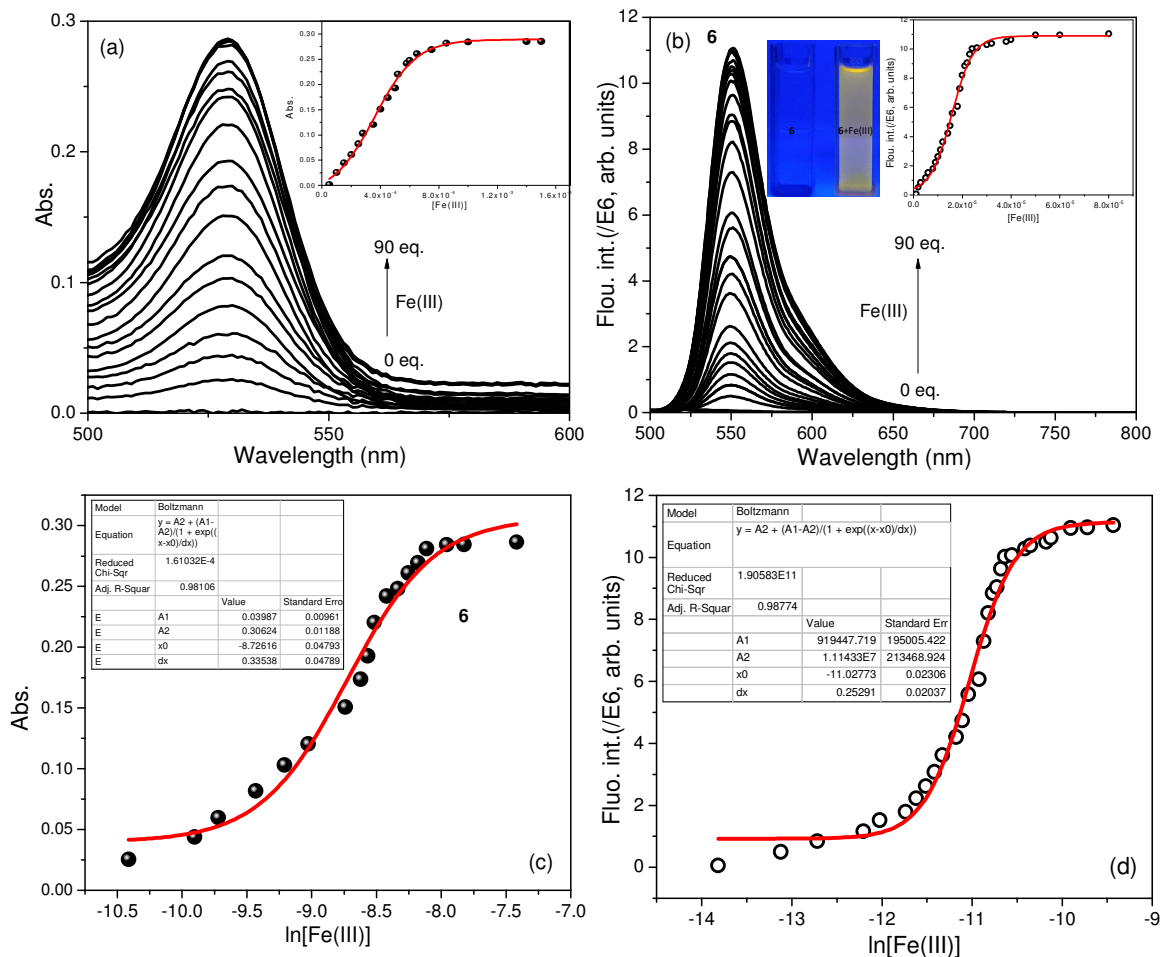

**Fig. S60:** (a) Absorption and (b) fluorescence spectra of **6** with added Fe(III) ions in EtOH-H<sub>2</sub>O (0.01M HEPES, 9:1 v/v); (c and d) non-linear fit to the plot of its intensities versus concentration ( $\ln[\text{Fe(III)}]$ ) for determination of  $K_a$ . [**6**] = 10  $\mu\text{M}$  (abs.); 1  $\mu\text{M}$  (Fluo.).

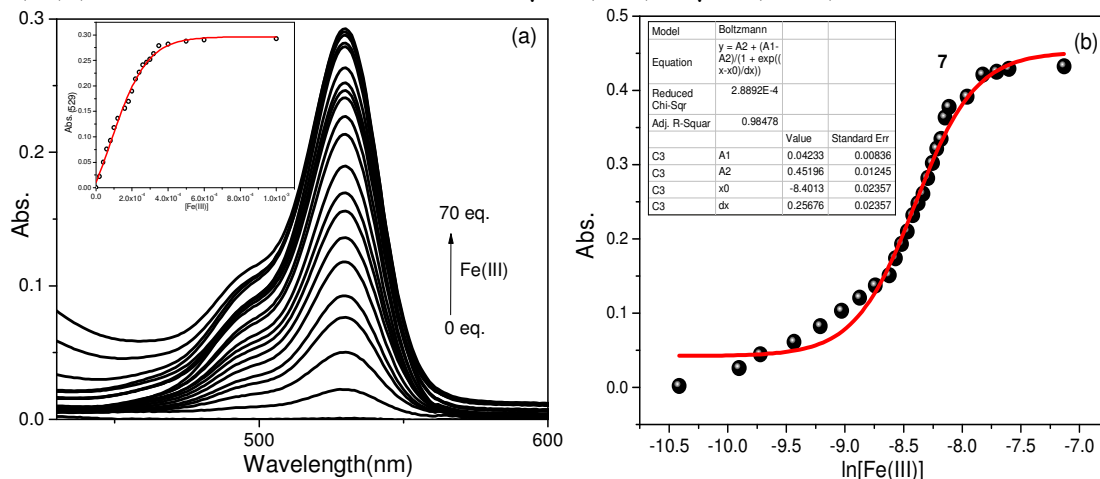

**Fig. S61:** (a) Absorption spectra of **7** with added Fe(III) ions in EtOH-H<sub>2</sub>O (0.01M HEPES, 9:1 v/v), (b) non-linear fit to the plot of its corresponding intensities versus concentration ( $\ln[\text{Fe(III)}]$ ) for determination of  $K_a$ . [**7**] = 10  $\mu\text{M}$  (abs.).

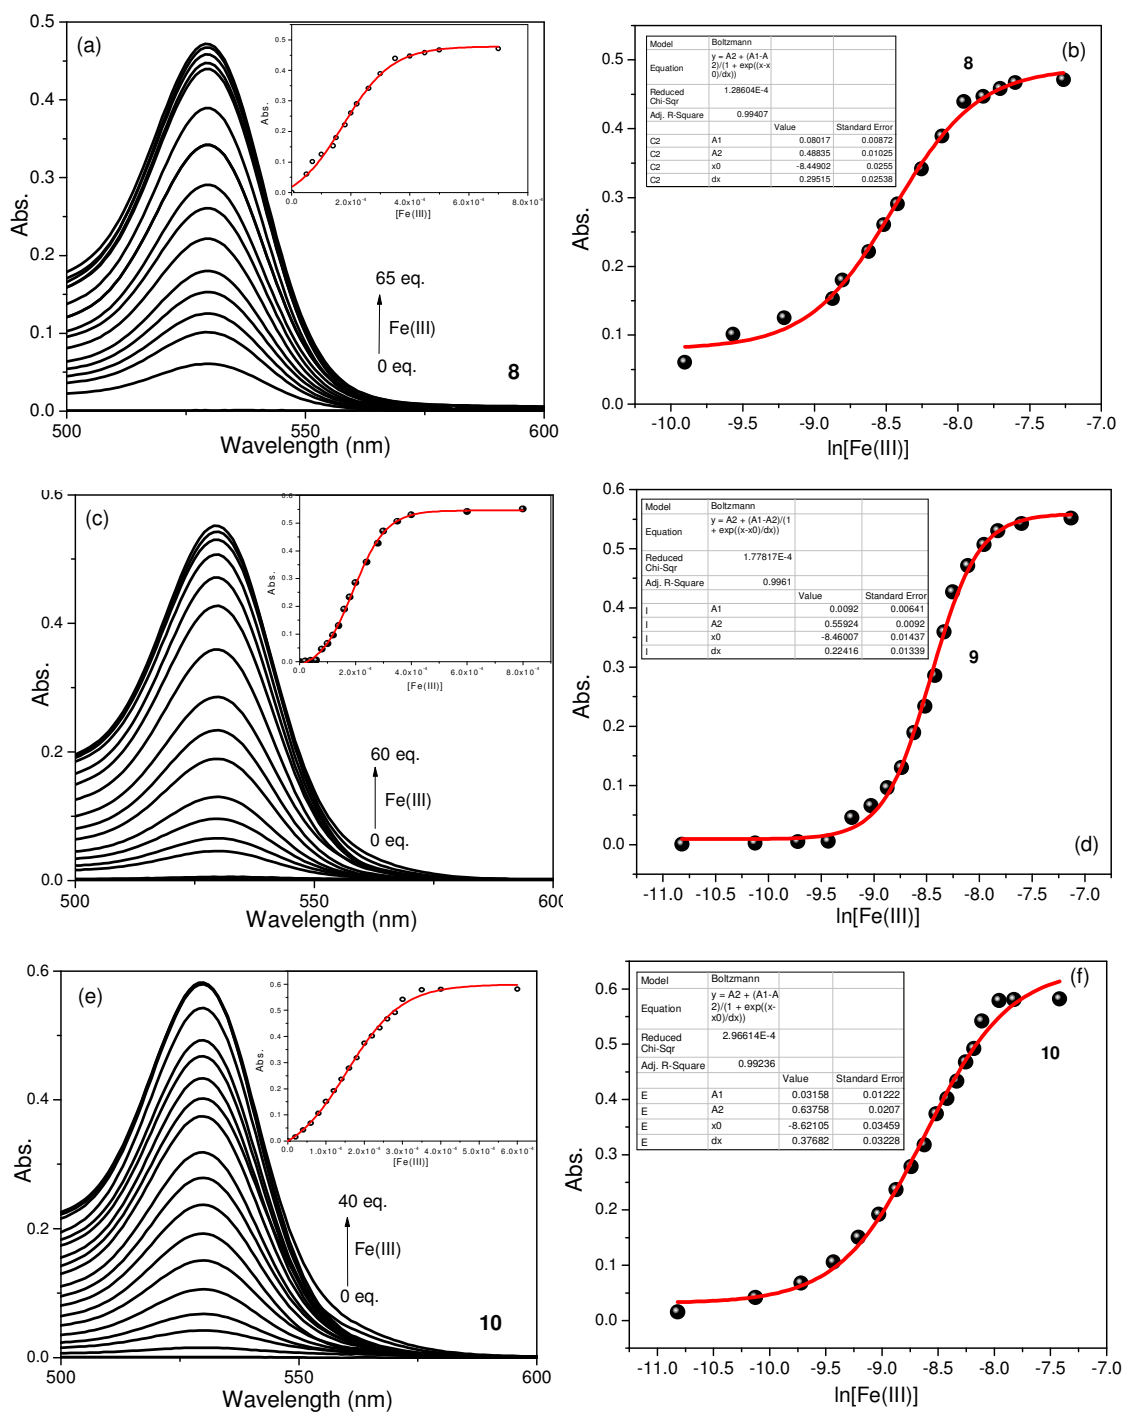

**Fig. S62:** (a) Absorption spectra (a, c and e) of **8**, **9** and **10** on gradual addition of Fe(III) ions in EtOH-H<sub>2</sub>O (0.01M HEPES, 9:1 v/v) medium, (b, d, f) Plot of their corresponding intensity versus concentration ( $\ln[\text{Fe(III)}]$ ) and subsequent non-linear regressions for determination of corresponding  $K_a$ . [**8**, **9**, **10**] = 10  $\mu\text{M}$  (abs.).



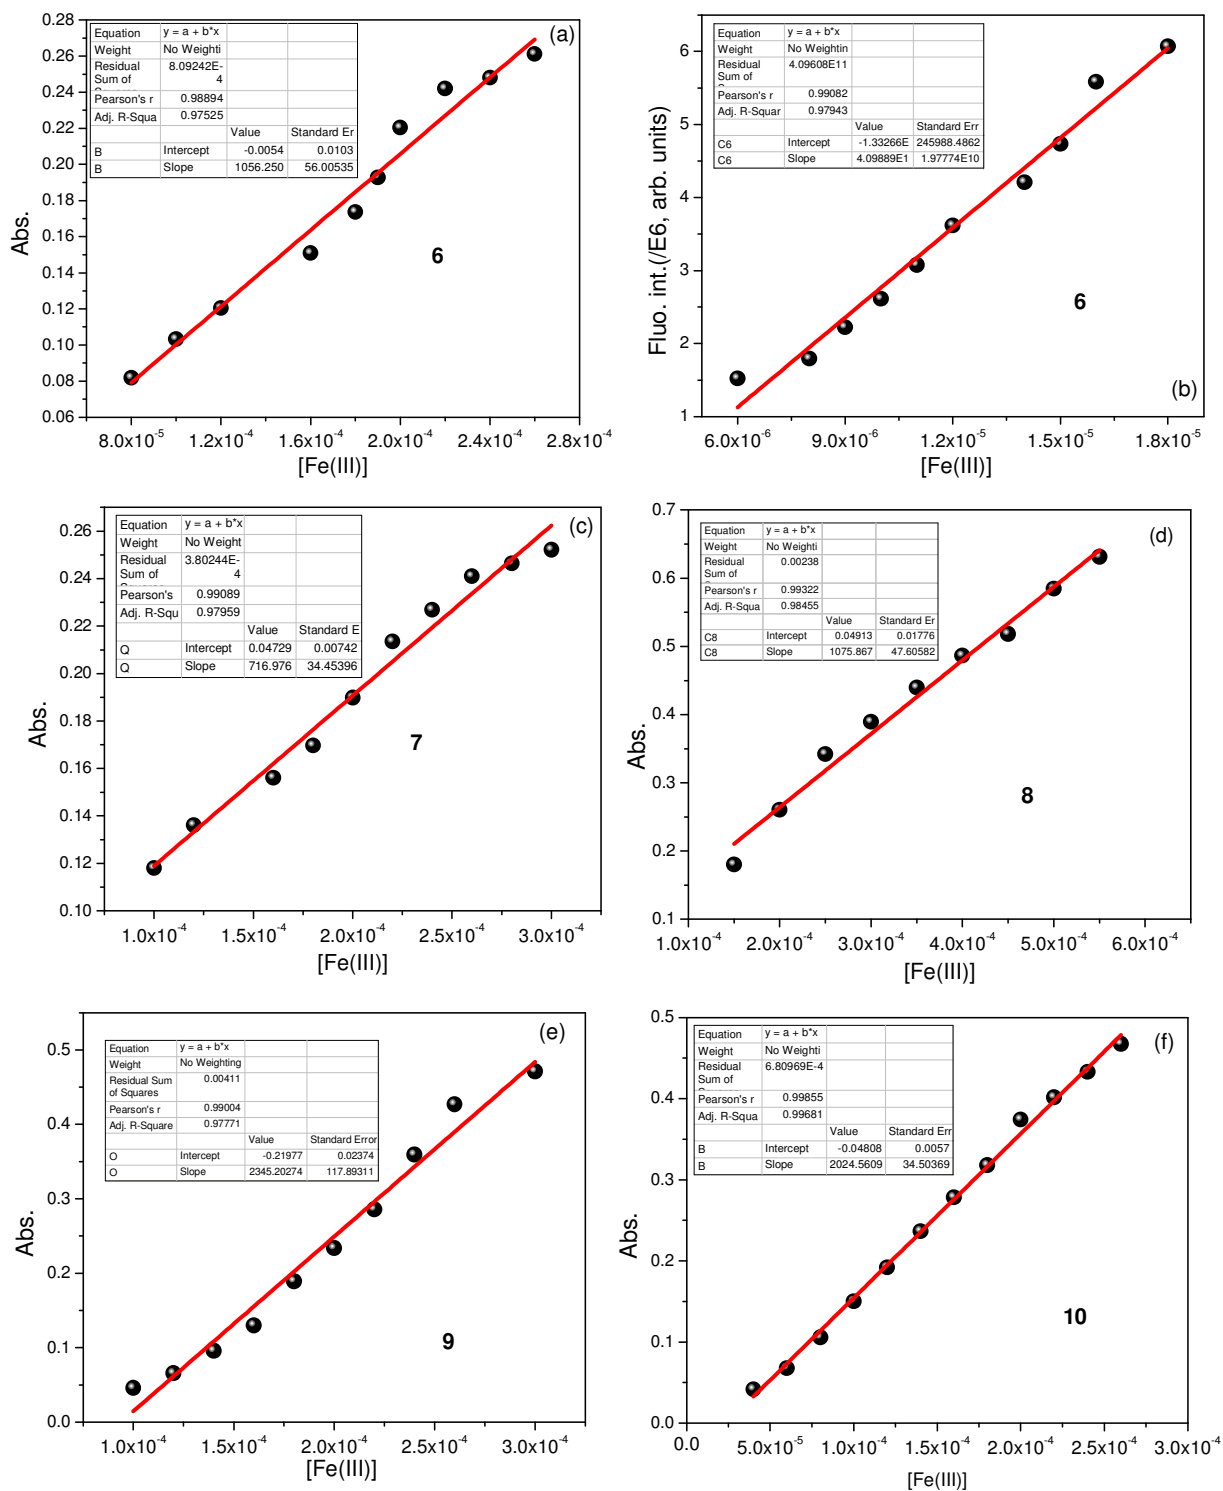

**Fig. S63.** Linear regression to the plot of absorbance of **6-10** (a, c, d, e, and f, respectively) and fluorescence intensities of **6** (b) on gradual addition of Fe(III) ion in a linear range for the determination of sensitivity of detection (S/N = 5).

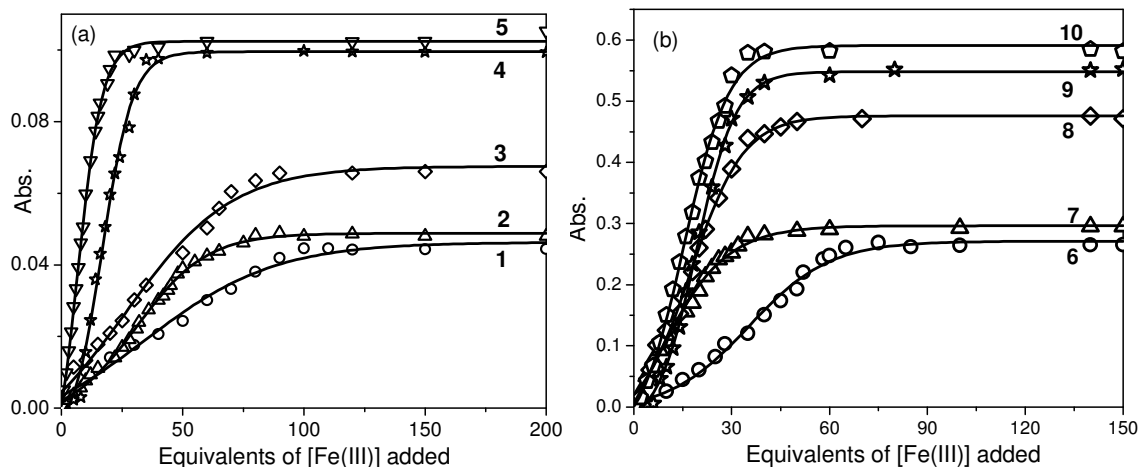

**Fig. S64:** Plot of absorbance of (a) 1-5 and (b) 6-10 on gradual addition of Fe(III) ions in EtOH-H<sub>2</sub>O (0.01M HEPBS, 9:1 v/v), [probes] = 10 μM.

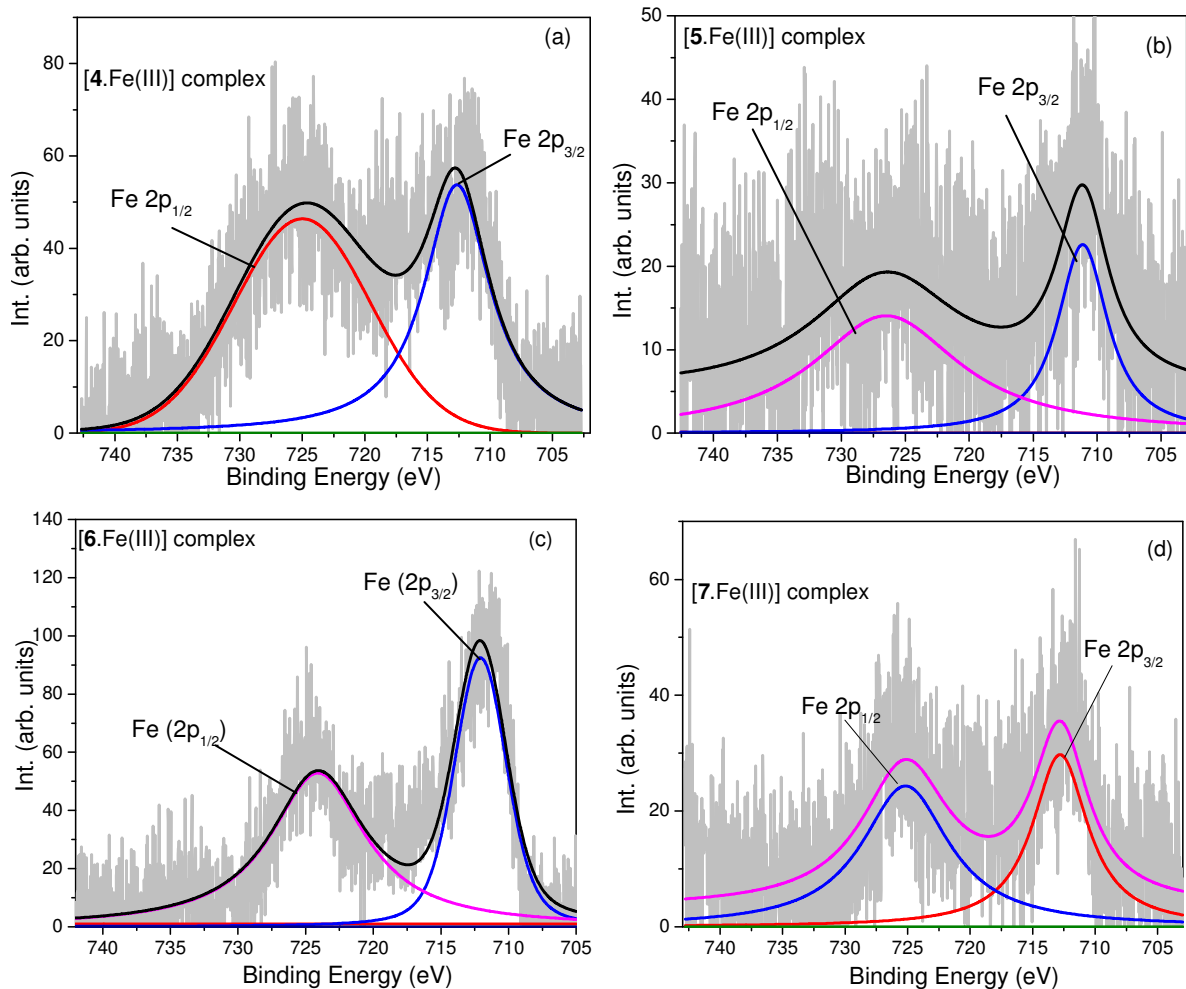

**Fig. S65:** Narrow-scan XPS spectral profile and corresponding component distribution fitting of Fe 2p region of Fe(III) complexes of 4 (a), 5 (b), 6 (c) and 7 (d).

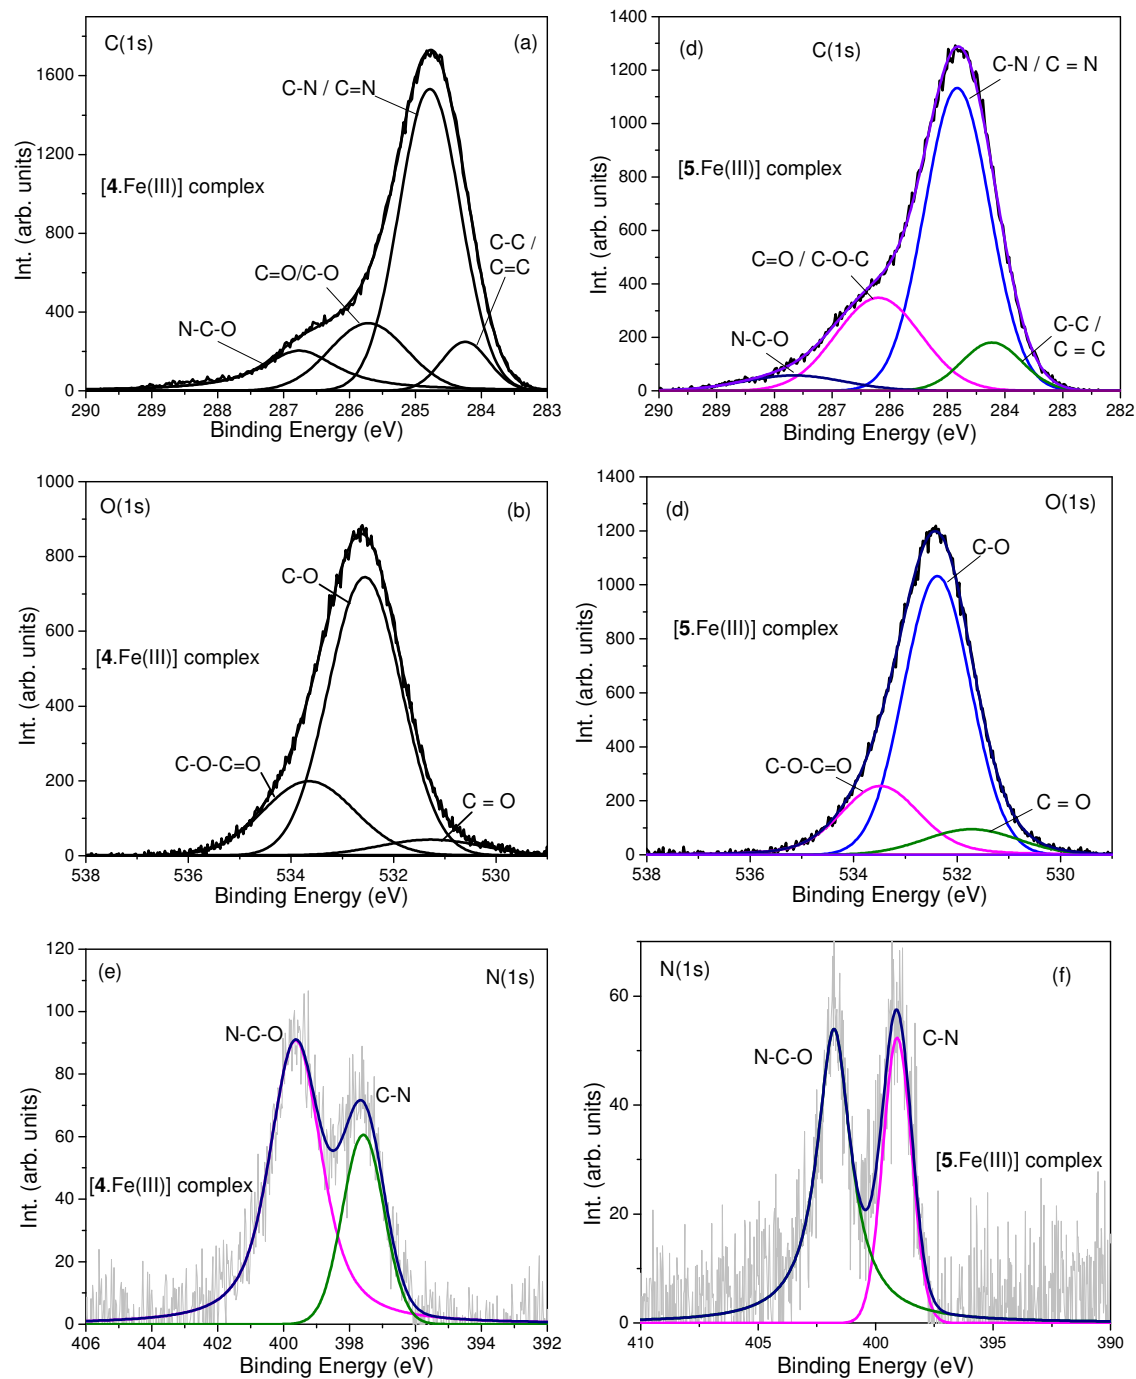

**Fig. S66:** Narrow-scan XPS spectral profile and corresponding component fitting of (a, d) C1s, (b, e) O1s and (c, f) N1s region in the Fe(III)-complexes of **4** (a, b, c) and **5** (d, e, f).

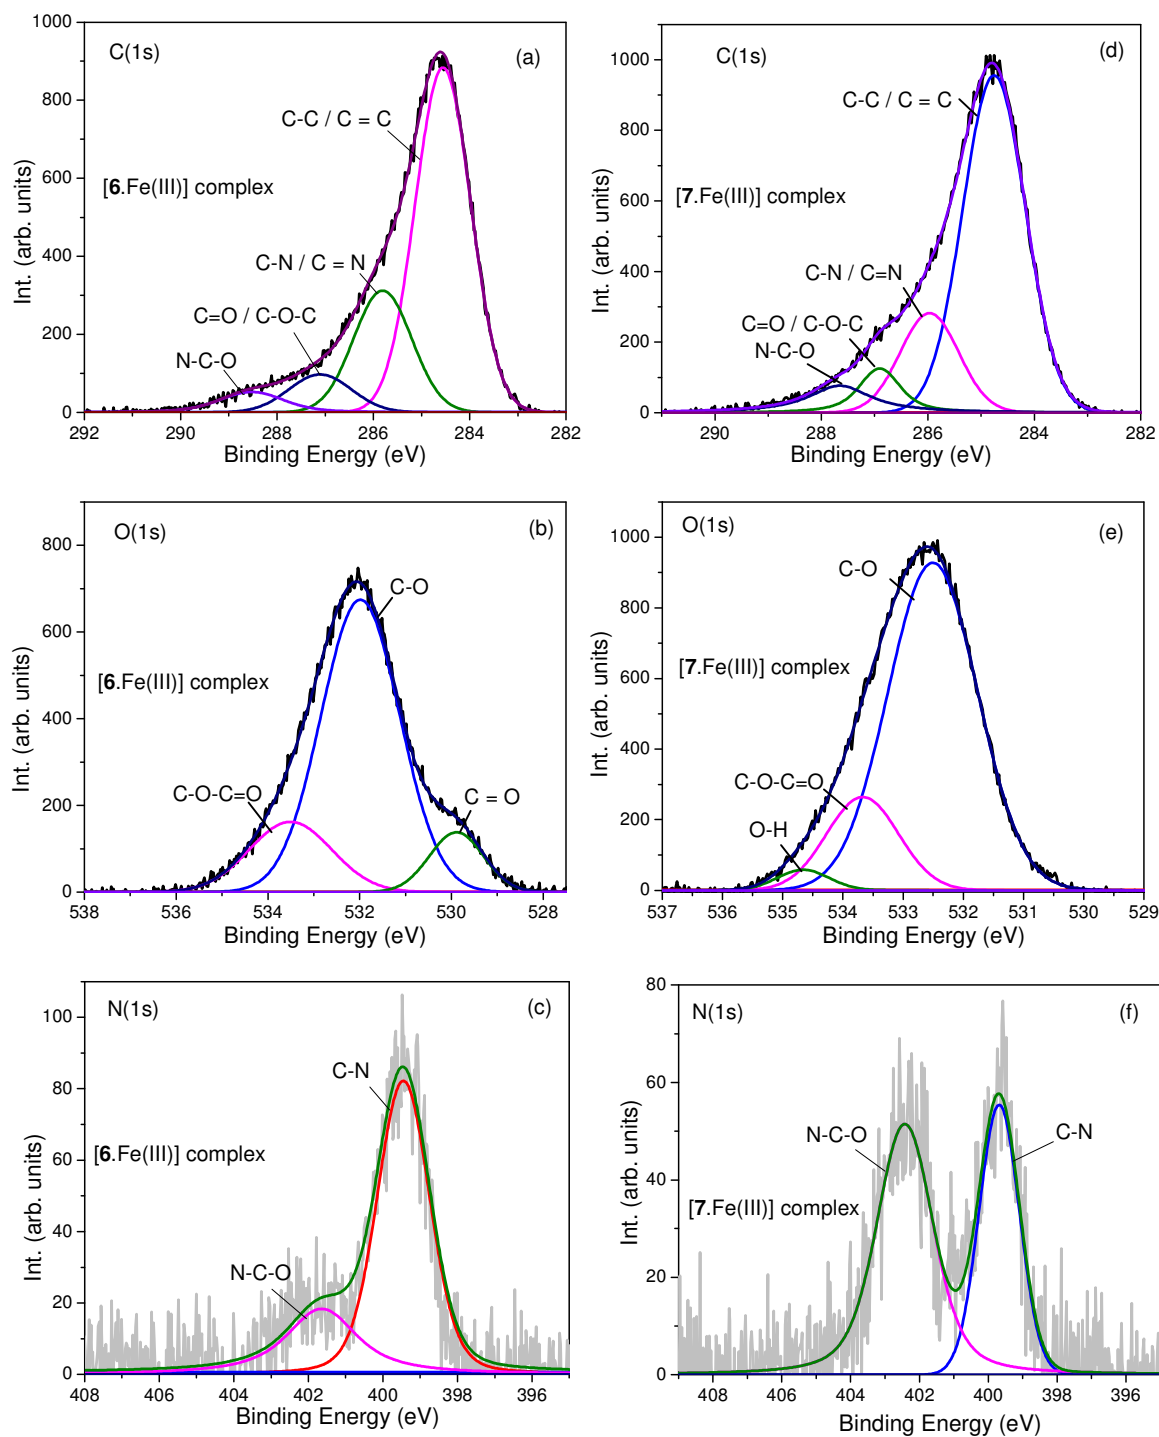

**Fig. S67:** Narrow-scan XPS spectral profile and corresponding component fitting of (a, d) C (1s), (b, e) O (1s) and (c, f) N (1s) region in the Fe(III) complexes of **6** (a, b, c) and **7** (d, e, f).

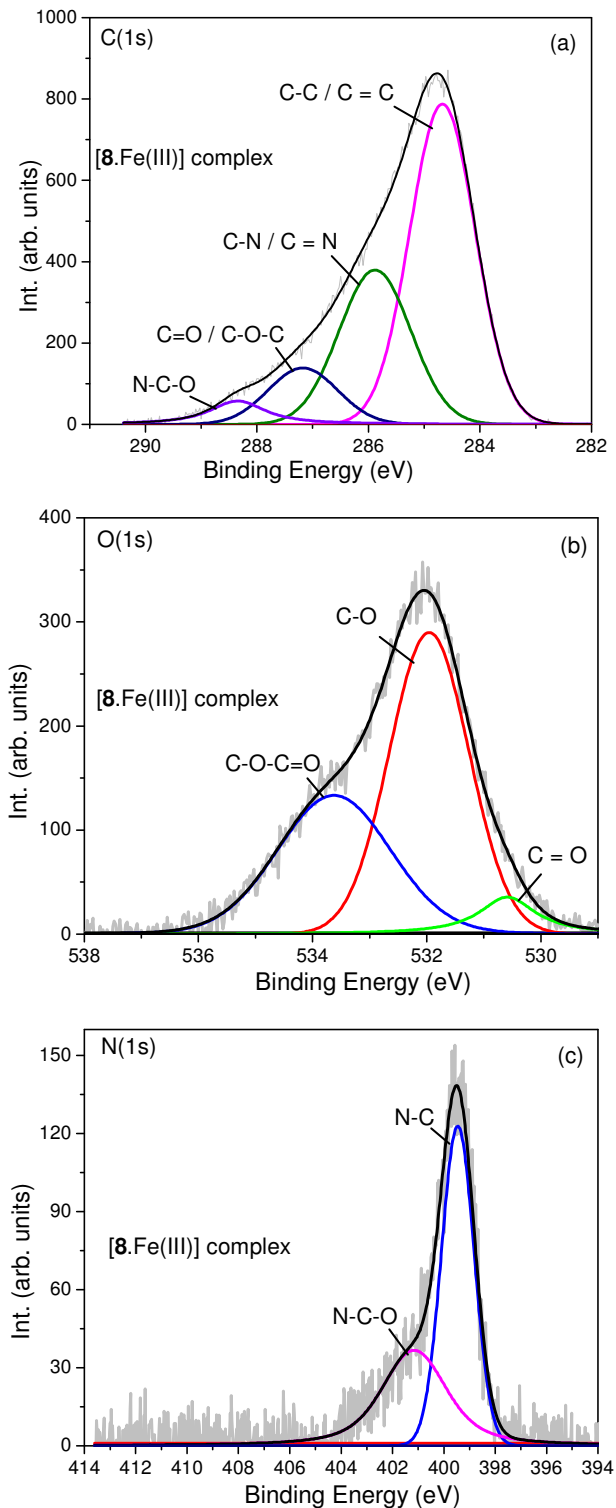

**Fig. S68:** Narrow-scan XPS spectral profile and corresponding component fitting of (a) C (1s), (b) O (1s) and (c) N (1s) region in the **8**-Fe(III) complex.

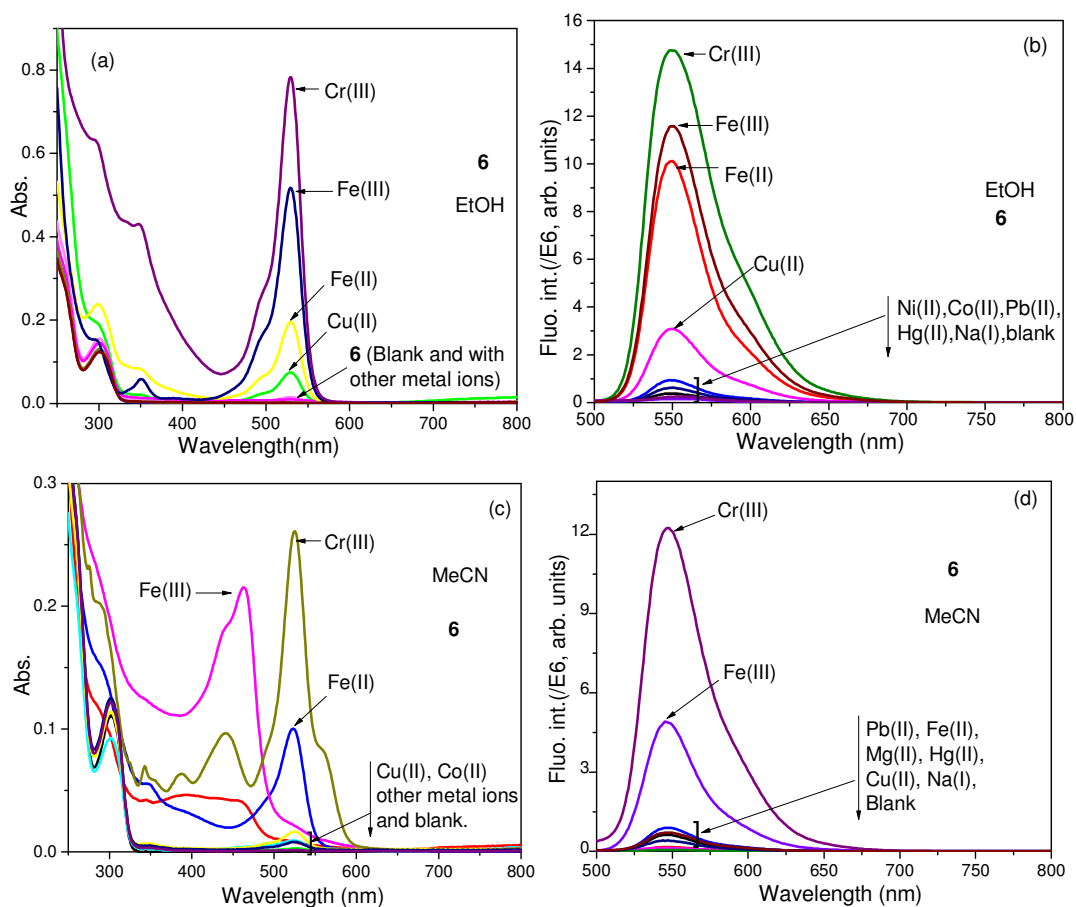

**Fig. S69:** Absorption (a, c) and fluorescence (b, d) spectral responses of **6** in presence of various metal ions in different solvents; in EtOH (a, b) and MeCN (c, d). *Conditions:* Abs.: [**6**] = 10  $\mu\text{M}$ , Fluo.: [**6**] = 1  $\mu\text{M}$ , [M(I/II/III)] = 5  $\mu\text{M}$ , em. and ex. band pass = 5 nm,  $\lambda_{\text{ex}}$  = 500 nm, RT. The probe **6** is responsive to multiple metal ions in pure organic solvents.

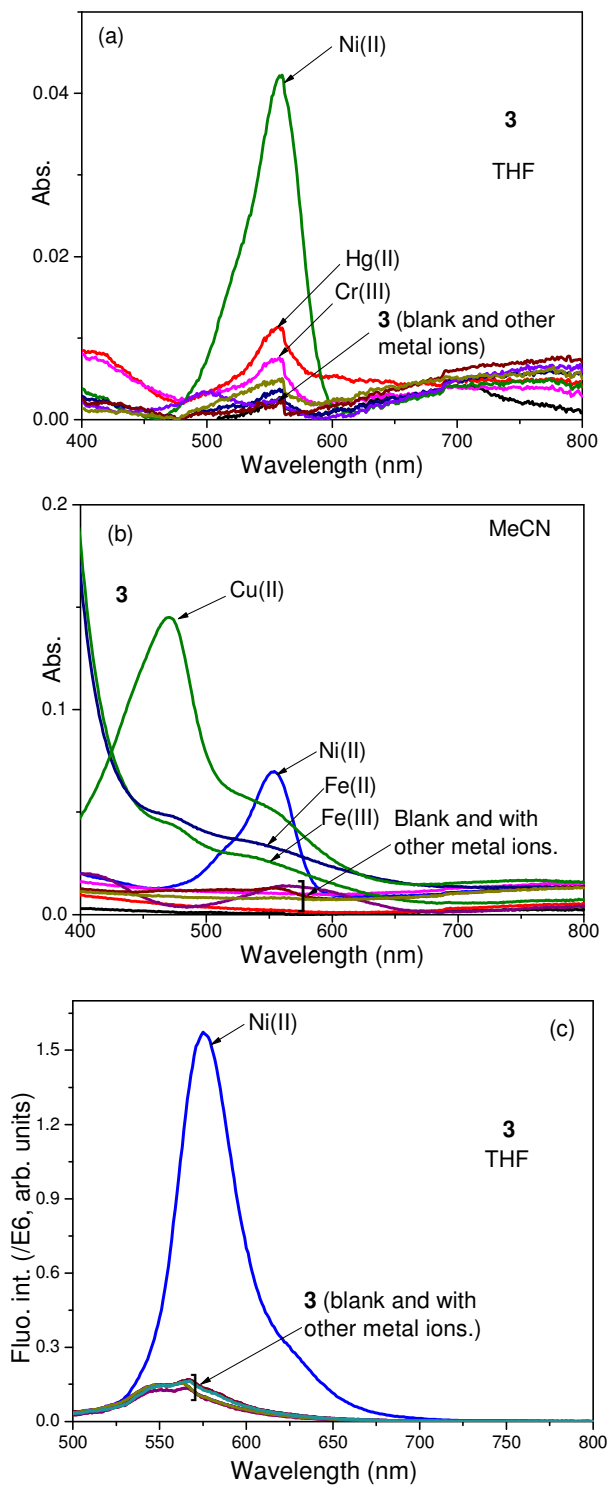

**Fig. S70:** Absorption spectra of **3** in (a) THF, (b) MeCN and Fluorescence (c) spectral responses of **3** in THF in presence of various metal ions. Conditions: Fluo.: [**3**] = 1  $\mu$ M, [M(I/II/III)] = 5  $\mu$ M, em. and ex. band pass = 5 nm,  $\lambda_{\text{ex}}$  = 500 nm, RT; This probe is responsive to multiple metal to ions in pure organic solvents.

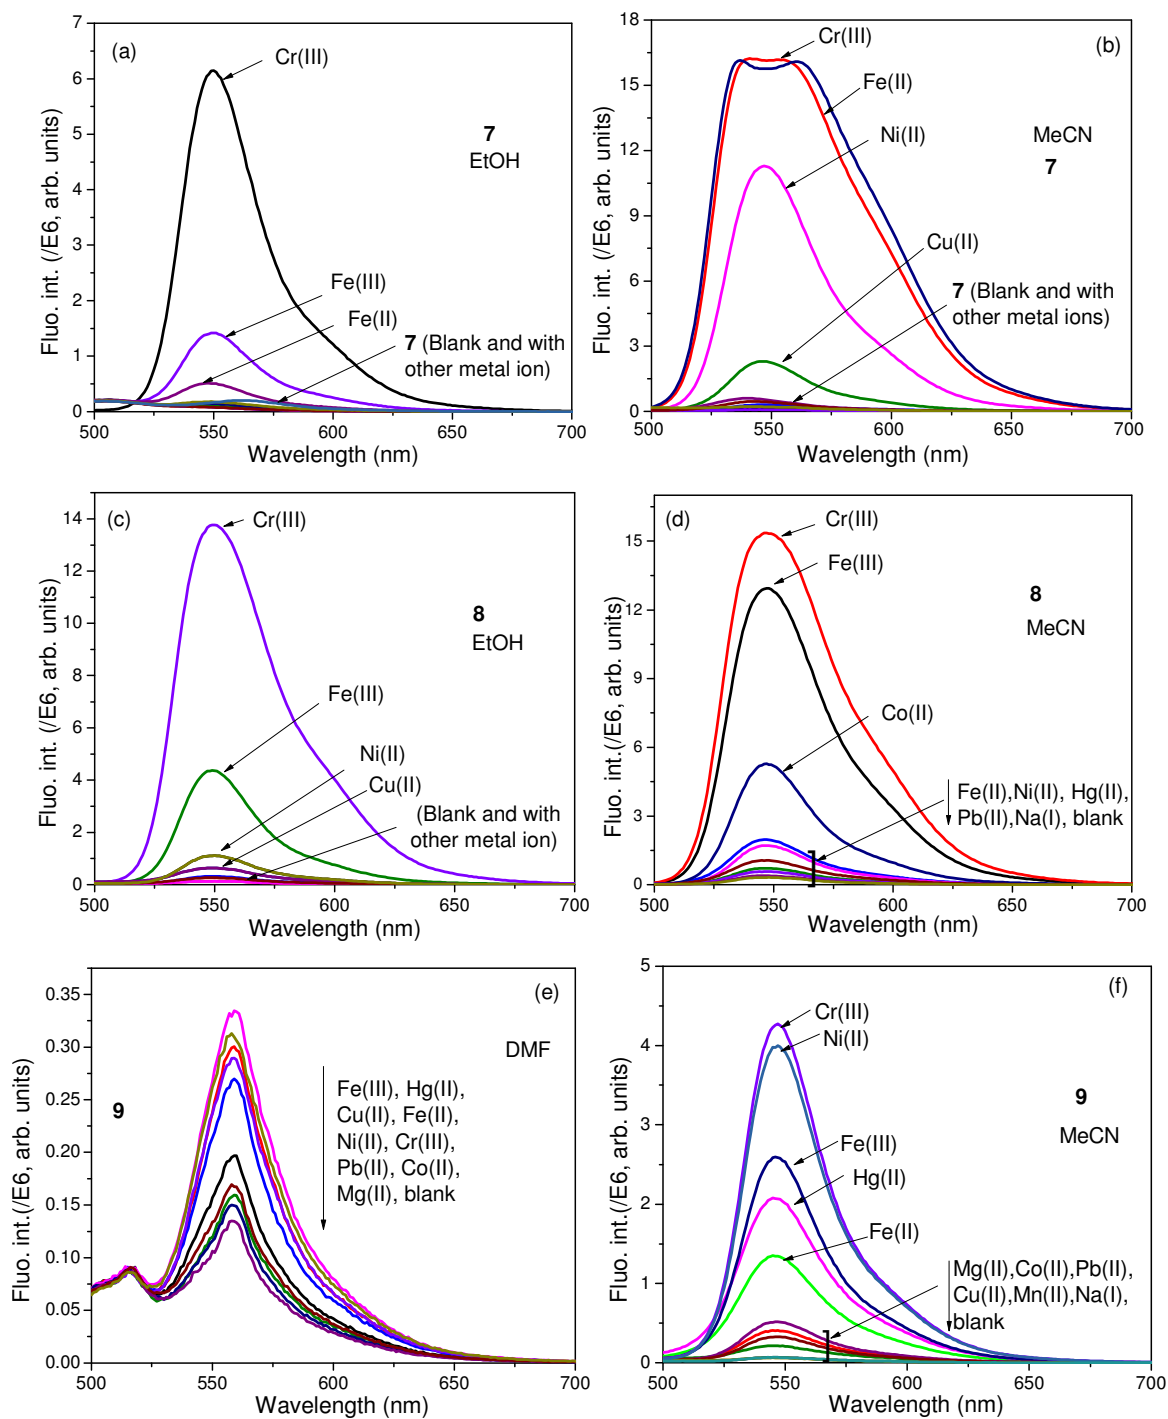

**Fig. S71:** Fluorescence spectra of **7** in (a) EtOH, (b) MeCN, that of **8** in (c) EtOH, (d) MeCN, and that of **9** in (e) DMF, (f) MeCN in presence of various metal ions. Conditions: Fluo.: [probes]=1  $\mu$ M, [M(I/II/III)] = 5  $\mu$ M, em. and ex. band pass = 5 nm,  $\lambda_{ex}$  = 500 nm, RT; These probes are responsive multiple metal ions in pure organic solvents(THF, EtOH, DMF, MeCN).



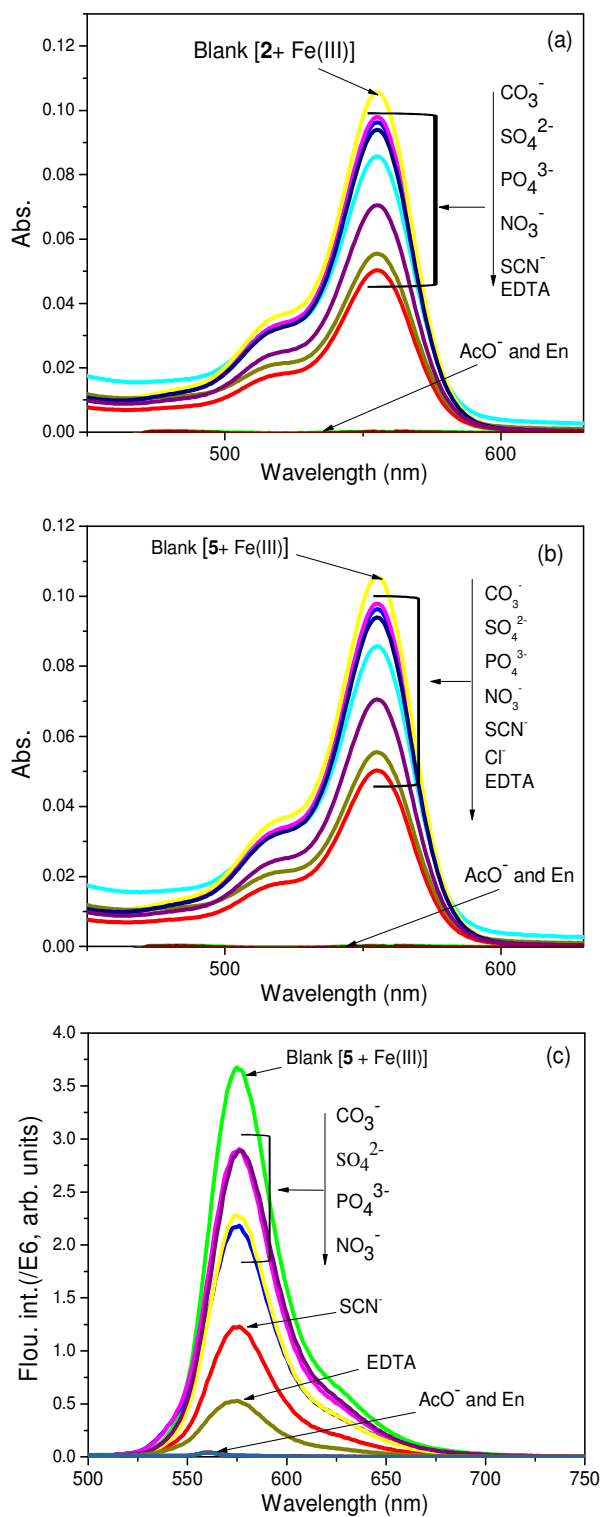

**Fig. S72:** Absorption spectral responses of Fe(III)-complexes of **2** and **5** in presence of various counter anions and chelating agents in EtOH-H<sub>2</sub>O (0.01M HEPES, 9:1 v/v) showing reversibility in signalling of Fe(III) induced absorption (a, b) and fluorescence (c) enhancements.

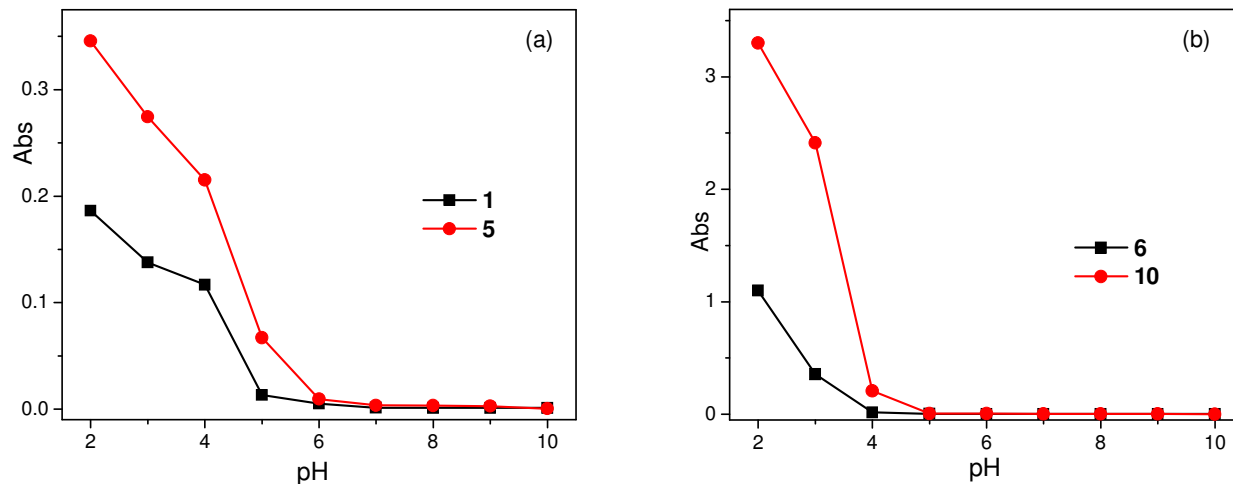

**Fig. S73:** Absorption spectral responses of (a) **1** and **5**, (b) **6** and **10** in EtOH-H<sub>2</sub>O (9:1 v/v) under different pH conditions. [probes] = 100 μM.

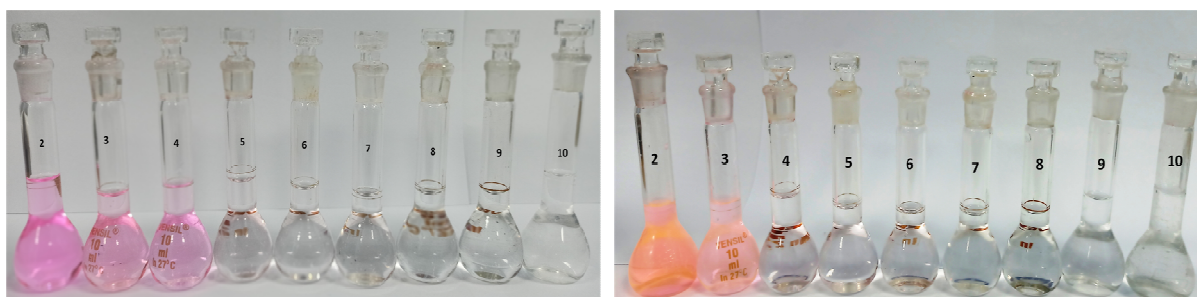

**Fig. S74:** Photograph of the solutions of **1** (left) and **6** (right) at varying pH (2-10) values.

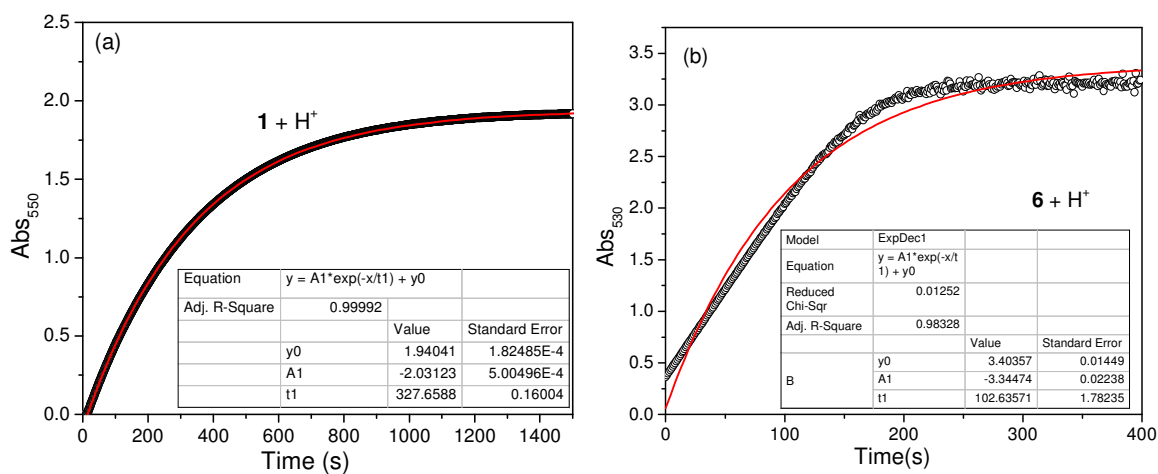

**Fig. S75:** Absorption spectral responses of (a) **1** and (b) **6** in presence of protons (perchloric acid) for determination of rate of proton-induced spiro-ring opening. [**1**] = [**6**] = 100 μM, in EtOH-H<sub>2</sub>O (9:1 v/v, 0.01 HEPES).

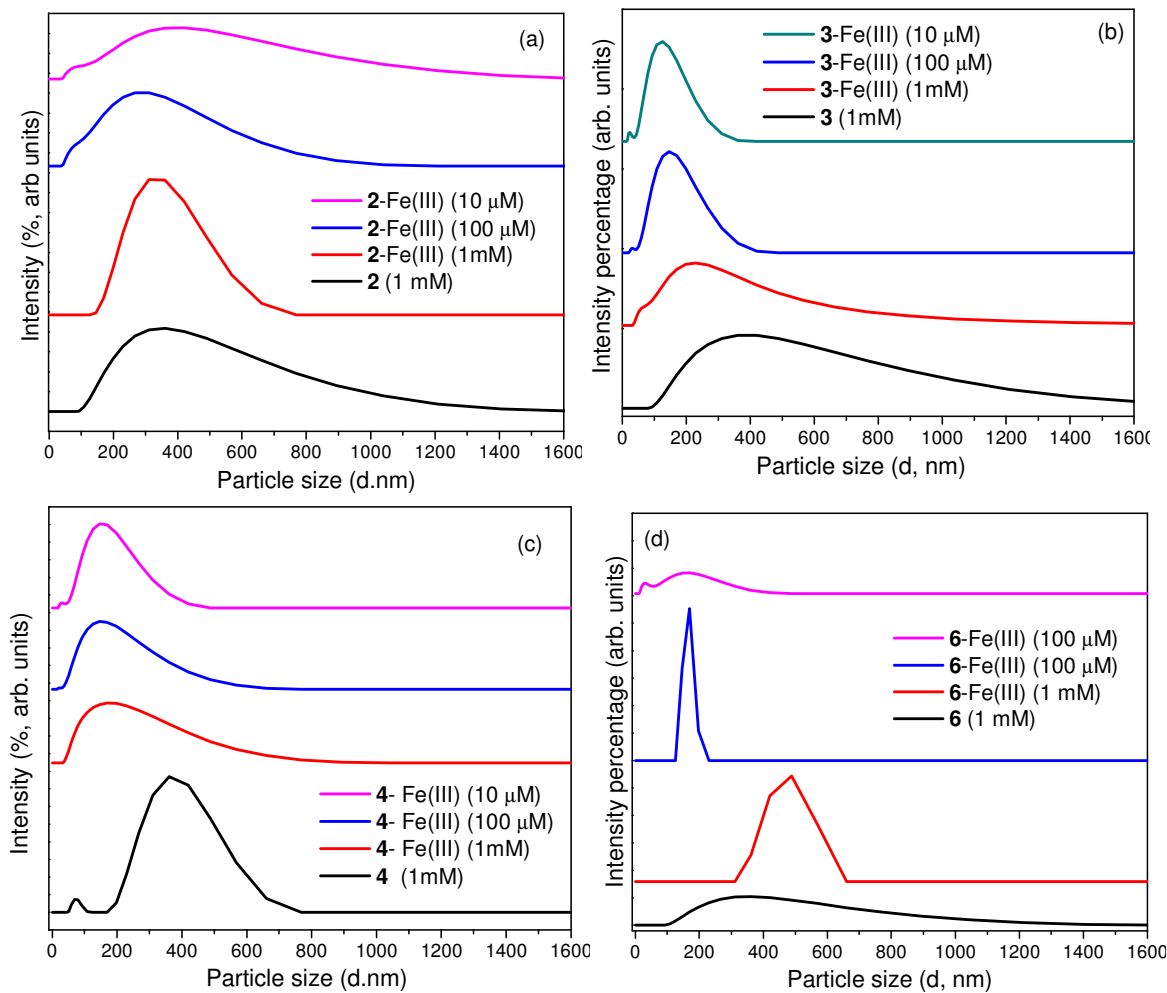

**Fig. S76:** Particle size of (a) **2**, (b) **3**, (c) **4** and (d) **6** and isolated solids of their Fe(III) complexes estimated through DLS measurements at different concentrations in EtOH-H<sub>2</sub>O (0.01M HEPES, 9:1 v/v) medium. Similar spectral data of DLS measurements were obtained for other probes and their Fe(III) complexes towards comprehension of confirmation of the aggregate formation.

**Table ST3:** Particle size with poly-dispersive index (PDI) of the probes (**1-10**) and isolated solids of their Fe(III) complexes estimated through DLS measurements at different concentrations in EtOH-H<sub>2</sub>O (0.01M HEPES, 9:1 v/v) medium.

| Entry             | Particle size of the aggregate (PDI) |              |             |             |
|-------------------|--------------------------------------|--------------|-------------|-------------|
|                   | 1 $\mu$ M                            | 10 $\mu$ M   | 100 $\mu$ M | 1mM         |
| <b>1</b>          | -                                    | -            | -           | 229 (0.823) |
| <b>1-Fe(III)</b>  | -                                    | -            | -           | 535 (0.629) |
| <b>2</b>          | -                                    | -            | -           | 333 (0.825) |
| <b>2-Fe(III)</b>  | -                                    | 161 (0.669)  | 268 (0.359) | 351 (0.458) |
| <b>3</b>          | -                                    | -            | -           | 353 (0.699) |
| <b>3-Fe(III)</b>  | -                                    | 122 (0.2605) | 148 (0.248) | 233 (0.441) |
| <b>4</b>          | -                                    | -            | -           | 358 (0.501) |
| <b>4-Fe(III)</b>  | -                                    | 148 (0.253)  | 188 (0.263) | 180 (0.521) |
| <b>5</b>          | -                                    | -            | -           | 145 (0.332) |
| <b>5-Fe(III)</b>  | -                                    | 145 (0.610)  | 247 (0.244) | 143 (0.318) |
| <b>6</b>          | -                                    | -            | -           | 360 (0.556) |
| <b>6-Fe(III)</b>  | -                                    | 152 (0.307)  | 172 (0.859) | 490 (0.736) |
| <b>7</b>          | -                                    | -            | -           | 361 (0.564) |
| <b>7-Fe(III)</b>  | -                                    | 61 (0.856)   | 130 (0.568) | 485 (0.825) |
| <b>8</b>          | -                                    | -            | -           | 132 (0.825) |
| <b>8-Fe(III)</b>  | -                                    | 138 (0.521)  | 111 (0.356) | 248 (0.935) |
| <b>9</b>          | -                                    | -            | -           | 420 (0.008) |
| <b>9-Fe(III)</b>  | -                                    | 66 (0.591)   | 143 (0.666) | 267 (0.957) |
| <b>10</b>         | -                                    | -            | -           | 525 (0.309) |
| <b>10-Fe(III)</b> | -                                    | 59 (0.400)   | 169 (0.625) | 424 (0.622) |

“-” could not be defined / high PDI

Following inferences from the experimental structural and electronic evidences for Fe(III) coordination to Rhodamine B based probes (**1-5**), the mechanism for Fe(III) coordination in the Rhodamine B based probes that resulted in photophysical signalling through complexation mediated spiro-ring opening is shown in the scheme (Scheme S1). The Rhodamine 6G based probes (**6-10**) too follow similar Fe(III) induced ring-opening mechanism.

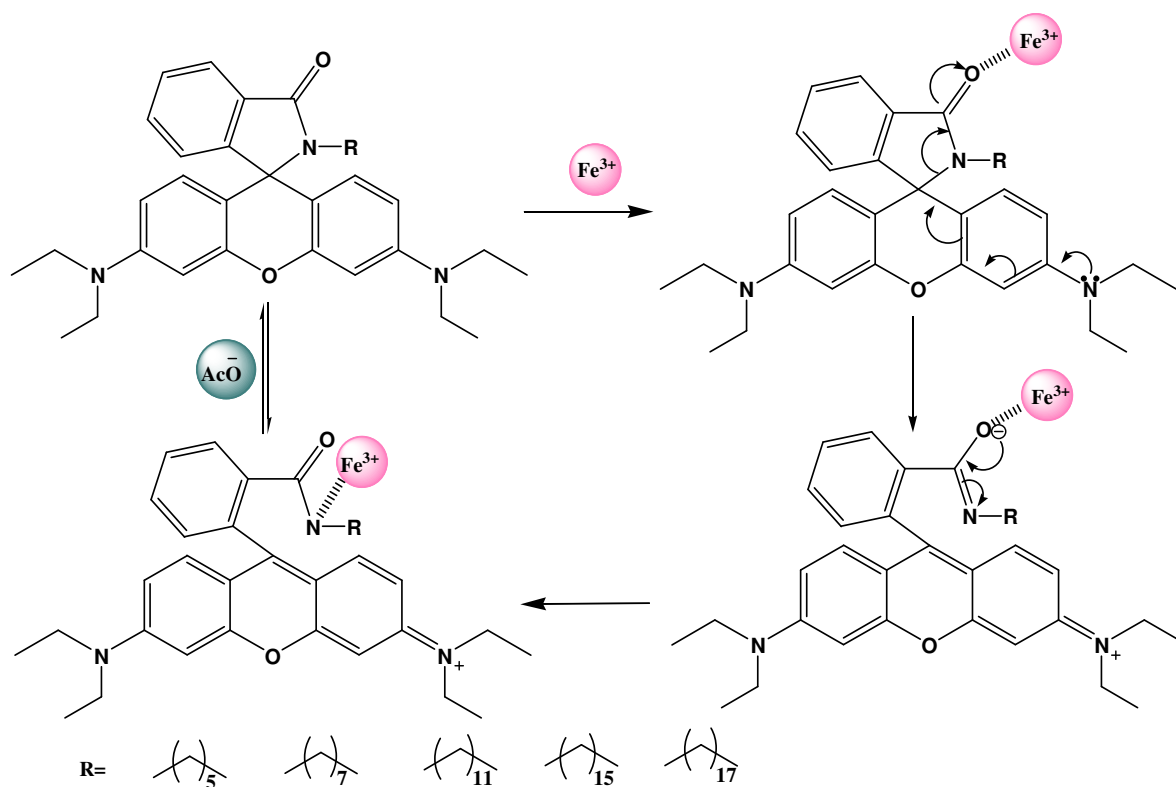

**Scheme S1:** Mechanistic pathway of Fe(III) complexation induced spiro-ring opening in Rhodamine B based probes leading to associated photophysical signalling pattern.
